## Linking gene expression to unilateral pollen-pistil reproductive barriers

Amanda K. Broz<sup>1,\*</sup>, Rafael F. Guerrero<sup>2,\*</sup>, April M. Randle<sup>1,3</sup>, You Soon Baek<sup>1</sup>, Matthew W. Hahn<sup>2,4</sup>, Patricia A. Bedinger<sup>1,^</sup>

<sup>1</sup>Department of Biology, Colorado State University, Fort Collins, CO 80523-1878

<sup>2</sup>Department of Biology, Indiana University, Bloomington, IN 47405

<sup>3</sup>Department of Environmental Science, University of San Francisco, San Francisco, CA 94117

<sup>4</sup>School of Informatics and Computing, Indiana University, Bloomington, IN 47405

\*These authors contributed equally to this work

^Corresponding author

### Email addresses of all authors:

AKB: [amanda.broz@colostate.edu](mailto:amanda.broz@colostate.edu); RFG: [rafguerr@indiana.edu](mailto:rafguerr@indiana.edu); AMR: [amrandle@usfca.edu](mailto:amrandle@usfca.edu);

YSB: [yousoon.baek@colostate.edu](mailto:yousoon.baek@colostate.edu); MWH: [mwh@indiana.edu](mailto:mwh@indiana.edu); PAB: [Bedinger@colostate.edu](mailto:Bedinger@colostate.edu)

### Author for correspondence:

Patricia Bedinger

Tel: 970 491-2879

Email: [bedinger@colostate.edu](mailto:bedinger@colostate.edu)

1 **Abstract**

2 Unilateral incompatibility (UI) is an asymmetric reproductive barrier that unidirectionally  
3 prevents gene flow between species and/or populations. UI is characterized by a compatible  
4 interaction between partners in one direction, but in the reciprocal cross fertilization fails,  
5 generally due to pollen tube rejection by the pistil. Although UI has long been observed in  
6 crosses between different species, the underlying molecular mechanisms are only beginning to  
7 be characterized. The wild tomato relative *Solanum habrochaites* provides a unique study  
8 system to investigate the molecular basis of this reproductive barrier, as populations within the  
9 species exhibit both interspecific and interpopulation UI. Here we used a transcriptomic  
10 approach to identify genes in both pollen and pistil tissues that may be probable key players in  
11 UI. We confirmed UI at the pollen-pistil level between a self-incompatible population and a self-  
12 compatible population of *S. habrochaites*. A comparison of gene expression between pollinated  
13 styles exhibiting the incompatibility response and unpollinated controls revealed only a small  
14 number of differentially expressed transcripts. Many more differences in transcript profiles were  
15 identified between UI-competent versus UI-compromised reproductive tissues. A number of  
16 intriguing candidate genes were highly differentially expressed, including a putative pollen  
17 arabinogalactan protein, a stylar Kunitz family protease inhibitor, and a stylar peptide hormone  
18 Rapid Alkalinization Factor. Our data also provide transcriptomic evidence that fundamental  
19 processes including reactive oxygen species signaling are likely key in UI pollen-pistil  
20 interactions between both populations and species. Our transcriptomic analysis highlighted  
21 specific genes, including those in ROS signaling pathways that warrant further study in  
22 investigations of UI. To our knowledge, this is the first report to identify candidate genes  
23 involved in unilateral barriers between populations of the same species.

24 **Keywords**

Intraspecific reproductive barriers; interpopulation interactions; plant mating system; pollen-pistil transcriptomes; self-incompatibility; *Solanum habrochaites*; unilateral incompatibility; wild tomato species

25 **Background**

26 Reproductive barriers are critical for maintaining species integrity, and their emergence  
27 between populations is associated with decreased gene flow and increased genetic divergence,  
28 ultimately leading to speciation. In a number of plant families, including the Solanaceae, a  
29 unidirectional post-mating prezygotic barrier termed unilateral incompatibility (UI) occurs at the  
30 level of pollen-pistil interactions. UI has most often been studied between genera or species [1-  
31 5], but there is also evidence of UI between populations of the same species [1, 6-9].

32 The unidirectionality of UI in crosses between species has been linked to plant mating  
33 system and specifically to the self-incompatibility response. Self-incompatible (SI) species are  
34 obligate outcrossers, whereas self-compatible (SC) species are capable of producing offspring  
35 through self-pollination. Gametophytic SI is the most common system of incompatibility in  
36 flowering plants [10] and in many families it is dependent on the activity of pistil-expressed *S*-  
37 locus ribonucleases, or S-RNases [11, 12]. Distinct from the sporophytic SI of the Brassicaceae  
38 in which pollen is rejected at the stigma surface [13, 14], in gametophytic SI growing pollen  
39 tubes are actively rejected within the style [11, 15-17]. This type of S-RNase-based SI is  
40 genetically determined by the polymorphic *S*-locus, which harbors pistil- (S-RNase) and pollen-  
41 (S-locus F-box) expressed factors that are required for the specificity of the SI response [18-21].  
42 Additional factors have also been implicated in SI, although they do not determine specificity.

43 These include pistil-expressed HT-proteins and 120K glycoproteins [22-24], as well as pollen-  
44 expressed components of the E3 ubiquitin ligase complex (Cullin1 and SKP1) [15, 25-29].

45 UI generally follows the SI x SC rule, wherein pollen of SC species is unable to fertilize  
46 SI ovules, but the reciprocal cross is compatible [4]. Because of this link between SI and UI,  
47 initial studies suggested pleiotropic effects of the *S*-locus on interspecific incompatibilities. In  
48 fact, more recent studies have shown that the proteins S-RNase, HT-protein, S-locus F-box 23  
49 and Cullin1 all function in both the SI and UI response, demonstrating mechanistic overlap  
50 between these two types of reproductive barriers [26, 28, 30-33]. However, it is also clear that  
51 genetic factors other than those involved in SI function in UI.

52 Crosses between SC species or populations (many of which do not express S-RNase)  
53 exhibit unexpected incompatibilities [1-4, 7, 31, 34, 35]. This suggests that there are at least two  
54 mechanisms underlying UI, one of which is S-RNase based and the other of which is S-RNase  
55 independent. Most SC species exhibit full crossability with other SC species; however only  
56 recently evolved SC populations of SI species exhibit UI [2, 4]. This suggests that the  
57 mechanistic factors underlying S-RNase independent UI are also present in populations that  
58 contain S-RNase. However, the number and type of factors involved in UI remains unclear and  
59 most models suggest roles for multiple UI genes of both large and small effect [2, 5, 8, 36].

60 The tomato clade (*Solanum* section *Lycopersicon*) offers ample opportunities to further  
61 understand and identify the genes involved in UI [37]. This small clade has recently diverged  
62 from a common SI ancestor [38, 39] over the course of ~2.5 million years [40]. The clade  
63 harbors six SC species, and seven SI species, three of which contain both SI and SC populations  
64 [41]. A number of studies have examined both the physiological aspects [1, 5, 42, 43] and

65 genetic basis [26-28, 30, 31, 33] of UI between members of the clade. In addition, a small  
66 number of studies have assessed UI between SI and SC populations within a species [1, 6-9, 43].

67 The wild tomato *Solanum habrochaites* is an ideal species in which to study both  
68 interspecific and interpopulation UI within the context of recently diverged populations. *S.*  
69 *habrochaites* has undergone at least two independent transitions from the ancestral SI state to SC  
70 at both the northern and southern species range margins [6,7, 9, 44]. The loss of SI at the  
71 northern range margin is correlated with the loss of pistil-side SI factor S-RNase [6, 31, 45];  
72 whereas southern *S. habrochaites* SC populations express an S-RNase protein with little or no  
73 RNase activity [31]. The genetic structure of *S. habrochaites* is consistent with the spread of  
74 populations both north and south from a central origin, with central SI populations showing the  
75 highest levels of diversity [44, 46]. Interestingly, the types and strengths of reproductive barriers  
76 displayed by a number of populations also follow this same latitudinal axis of divergence [6, 44].

77 Previous studies have demonstrated variation in the strength of both intra- and  
78 interspecific UI in different *S. habrochaites* populations [1, 6-9, 31, 35]. For instance, a central  
79 *S. habrochaites* SI population (LA1777) rejects pollen tubes from a subgroup of northern *S.*  
80 *habrochaites* SC populations, including LA0407; whereas LA0407 and other SC populations  
81 accept LA1777 pollen tubes [1, 6].

82 In interspecific interactions, when either SC *S. lycopersicum* or SC *S. neorickii* (as  
83 female) is crossed with *S. habrochaites* (as male), crosses result in fruit [47, 48]. In the  
84 reciprocal cross, pistils of SI and southern SC populations of *S. habrochaites* rapidly reject  
85 interspecific SC pollen after a few millimeters of growth through the style, demonstrating a  
86 classic UI response [1, 6, 31]. However, interspecific pollen tube rejection is delayed in many  
87 northern SC populations of *S. habrochaites*, [1, 6, 31], and one unique SC population (LA1223)

88 is unable to reject both *S. lycopersicum* and *S. neorickii* pollen tubes [6]. LA1223 is the only  
89 known *S. habrochaites* population that does not accumulate the pistil HT-protein [6, 31], which  
90 may explain this extraordinary lack of UI at the pollen-pistil level.

91 Although elegant mapping, biochemical and transgenic studies have revealed that SI  
92 factors are important players in UI [12, 23, 26, 28, 30, 31, 33, 49], the full suite of molecular  
93 factors involved in the complex UI response are only beginning to be characterized. The  
94 evidence for both interspecific and interpopulation UI in *S. habrochaites* suggests that factors  
95 other than those involved in SI are involved in UI. This is consistent with transgenic studies in  
96 tomato showing that together S-RNase and HT-protein can act to reject pollen from only a subset  
97 SC species, and even then pollen tube rejection is delayed [33].

98 Transcriptome profiling can provide a broad view of the factors involved in pollen-pistil  
99 interactions and represents a powerful tool for candidate gene identification. Studies in  
100 *Arabidopsis* have identified large numbers of genes that are specific to pollen or pistil, as well as  
101 those that are specifically induced upon the interaction between the two in compatible  
102 pollinations [50-53]. However, very few studies have investigated pollen-pistil transcriptomes in  
103 response to UI. In a recent study, Pease et al. [54] identified a number of interspecific UI  
104 candidate genes by comparing stylar transcriptomes of UI-competent *S. pennellii* and UI-  
105 deficient *S. lycopersicum*, two species which likely diverged over 2 mya [40]. Their analysis  
106 identified a large number of loci that varied in expression between styles of these two species,  
107 and highlighted the importance of HT-protein in UI [54].

108 Here, we used a similar transcriptomics approach to broadly characterize the molecular  
109 factors involved in UI in *S. habrochaites* at the level of pollen-pistil interactions. The  
110 populations selected for study have recently diverged (< 0.8 mya, [40]), and exhibit differences

111 in both interspecific and interpopulation reproductive barriers. To our knowledge, this is the first  
112 report using transcriptomics to identify novel candidate genes associated with reproductive  
113 barriers between diverging populations within a species.

114

## 115 **Results**

### 116 ***Pollen-pistil interactions in SI LA1777 and SC LA0407***

117 Using pollen tube growth assays, we confirmed that all LA1777 (SI) individuals used in  
118 RNA-seq experiments rejected both self-pollen tubes and those of LA0407, but accepted pollen  
119 from other LA1777 individuals (intrapopulation). Further, we confirmed that each LA0407 (SC)  
120 individual accepted pollen tubes from LA1777, self, and intrapopulation crosses.

121 In compatible crosses, pollen tubes generally reach the ovary within 24 hours [1, 31].  
122 However, incompatible crosses may differ in the timing of pollen tube rejection [1]. To identify  
123 the post-pollination time-point at which pollen tube rejection occurs in the incompatible cross  
124 between LA1777 (female) and LA0407 (male), pistils were pollinated and harvested over a time  
125 course. Pistils of LA1777 were actively rejecting pollen of LA0407 at 12 hours post-pollination,  
126 and full rejection occurred by 48 hours (Fig. 1). In an attempt to capture changes in gene  
127 expression that would correspond to active pollen tube rejection, we chose to harvest stylar tissue  
128 16 hours post-pollination for subsequent RNA-seq experiments. At this point, incompatible  
129 pollen tubes will have traversed ~20% of the style length (Fig. 1), whereas compatible pollen  
130 tubes will have traversed ~60% of style length [31].

131

132 ***Differential gene expression between UI-competent and compromised populations***

133 We sampled both pollen and stylar tissue to better characterize differences in  
134 transcriptomes between UI-competent LA1777 and UI-compromised LA0407 (Fig. 2). Styles  
135 were either unpollinated (UP) or subject to three different treatments including self,  
136 intrapopulation and interpopulation pollination (Fig. 2). We analyzed a total of 33,055 genes,  
137 out of which 7,358 (22.3%) were specific to pollen (that is, they were upregulated in pollen with  
138 respect to all styles), and 4,793 (14.5%) were specific to styles. Additionally, we found 1,492  
139 genes that were highly upregulated only in tissues of LA1777 and 1,382 genes highly  
140 upregulated only in LA0407 (4.5% and 4.2% of genes analyzed, respectively).

141

142 ***Pollination type significantly influences a small number of genes***

143 We expected that stylar transcriptomes would exhibit differences due to the type of  
144 pollination and whether or not a pollination was compatible. We performed three separate  
145 pairwise comparisons to look at differential gene expression in unpollinated (UP) LA1777 styles  
146 compared to different pollination types (intrapopulation, self and interpopulation). Pairwise  
147 comparisons between pollinated and UP LA1777 styles revealed only a small number of  
148 differentially expressed genes, all of which were expressed at very low levels (<0.3 counts per  
149 million (cpm)), Additional File 1, Table S1 (self vs UP); Additional File 1 Table S2  
150 (intrapopulation vs UP) and Additional File 1, Table S3 (interpopulation vs UP)). In all  
151 pollination treatments we identified pollination-induced differential expression of a number of  
152 hypothetical proteins, RNA-directed DNA polymerases and retrovirus-related reverse  
153 transcriptases. However, only three genes showed similar regulation among all pollination



154 treatments: a hypothetical protein (Sopen05g010690) and two genes that have high homology to  
155 a Copia-like retrotransposon (Sopen01g019140 and Sopen02g008750).

156 Five genes were similarly differentially expressed in incompatible crosses with LA1777  
157 as female (self and interpopulation crosses, Additional File 1, Table S1 and Table S3) versus  
158 compatible crosses (intrapopulation, Additional File 1, Table S2), three of which encoded  
159 hypothetical proteins. In addition, a cystathionine beta synthase (CBS) domain-containing  
160 protein (Sopen06g019460) was downregulated 3-fold in incompatible crosses. It has been  
161 proposed that CBS proteins are redox regulators involved in the modification of cell wall  
162 composition, and in *Arabidopsis*, changes in CBS expression can reduce self-fertility [55]. A  
163 homolog of *Defective meristem silencing 3* (DMS3, Sopen03g019410), a gene that is involved in  
164 silencing and epigenetic modification, was also downregulated 3-fold in incompatible crosses  
165 [56].

166 Thirty two genes that were differentially regulated between interpopulation pollination  
167 and UP styles (Additional File 1, Table S3), but not in other treatments (self vs UP, Additional  
168 File 1, Table S1 or intrapopulation vs UP, Additional File 1, Table S2). Interesting candidates  
169 included a Ras-related GTPase (Sopen04g023040, Rab3), a pollen specific calcium binding  
170 annexin (Sopen04g003390), and a K<sup>+</sup> transporter (Sopen11g006300) were upregulated ~3-fold in  
171 interpopulation pollinations. Another candidate gene, upregulated 16-fold in interpopulation  
172 pollinations encodes a H<sub>2</sub>O<sub>2</sub> transporter (Sopen10g033580, PIP2). Each of these genes are  
173 potentially involved in reactive oxygen species (ROS) signaling during pollen-pistil interactions  
174 [57-61], and their upregulation in interpopulation pollinations may alter ROS signaling, resulting  
175 in the dysfunctional pollen tube growth characterized by UI. Further, in interpopulation  
176 pollinations, an endonuclease was upregulated over 18-fold, and a DNase over 2.9 fold.

177 Intriguingly, in *Pyrus pyrifolia* and *Papaver rhoeas*, the disruption of ROS signaling in  
178 incompatible (self) pollen tubes leads to depolymerization of the actin cytoskeleton and an  
179 increase in nuclear DNA degradation [62, 63].

180

### 181 *Differential gene expression related to UI-competence in styles*

182 Although a number of potentially interesting candidates involved in UI were identified  
183 from our pairwise comparisons, they were expressed at relatively low levels, often showed only  
184 low fold-changes, and had relatively high p-values ( $p < 0.05$ ). A principal components analysis  
185 (PCA) of all stylar treatments showed that most of the variation between samples could be  
186 explained by source population, and that there was no consistent grouping of styles due to  
187 pollination treatment (Additional File 2, Fig. S1). The fact that few significant differences were  
188 detected between UP styles and pollination treatments may reflect results of previous studies  
189 indicating that the genes involved in UI-competence are expressed in styles regardless of  
190 pollination status [31, 37, 54]. In other words, the UI-competent styles appear ‘primed’ to reject  
191 incompatible pollen, as large changes in gene expression are not seen between UP styles and  
192 those pollinated with compatible versus incompatible pollen parents. Because of these results,  
193 we also performed an analysis in which all stylar treatments within a population (UP, pollinated  
194 with self, intrapopulation and interpopulation pollen) were pooled to capture differential  
195 expression between UI-competent (LA1777) versus UI-compromised (LA0407) styles.

196 We identified 179 genes that were significantly upregulated in UI-competent versus  
197 compromised styles, and 179 that were significantly downregulated (Additional File 1, Table S4  
198 and Table S5). However, we focused our interest predominantly on genes that showed a mean

199 expression level over 3 normalized cpm and were upregulated over 10-fold in UI-competent  
200 versus compromised styles. The top 25 genes showing the largest upregulation in UI-competent  
201 styles are shown in Table 1.

202           Within the top 25 genes showing the highest upregulation in UI-competent versus  
203 compromised styles, we found ten that are involved in oxidation-reduction reactions (Table 1).  
204 These included three Cytochrome P450 genes (Sopen02g037430, Sopen06g021780,  
205 Sopen07g028940), an Alkenal Reductase (Sopen12g006330), a Glutathione S-Transferase  
206 (Sopen12g026980), an NAD(P)H-Dehydrogenase (Sopen05g003640), and an NAD(P)-  
207 Oxidoreductase (Sopen12g021490). In addition, we identified two genes involved in early steps  
208 of flavonoid biosynthesis: Chalcone Synthase 2 (Sopen05g032070) and Chalcone-Flavanone  
209 Isomerase (Sopen05g030780). Finally, we discovered that the gene showing the highest  
210 upregulation in UI-competent styles (hypothetical protein, Sopen12g017530) contains a heavy  
211 metal-associated domain (Additional File 2, Fig. S2), suggesting that it also may be involved in  
212 oxidation-reduction reactions.

213           In UI-competent styles, we also identified three upregulated genes that are putatively  
214 involved in defense response. These included an Endo-Chitinase involved in jasmonic acid and  
215 ethylene signaling (Sopen02g027710) that was highly expressed (182 cpm) and upregulated over  
216 20-fold, a Beta-Glucosidase (Sopen11g004500) and a Disease Resistance Protein  
217 (Sopen10g025030) (Table 1). These genes are of interest, as many molecular components  
218 involved in plant-pathogen interactions show significant overlap with those involved in pollen  
219 tube growth and guidance [64].

220           One gene of particular interest that was highly upregulated in UI-competent styles is the  
221 hypothetical protein Sopen02g033850 (Table 1), which shows 80% amino acid identity to the

222 peptide hormone Rapid ALkalinization Factor (RALF) from the wild potato, *S. chacoense*.  
223 Small secreted peptides including RALFs are involved in a wide variety of plant functions  
224 including development and immunity [65], and a pollen-specific RALF from *S. lycopersicum*  
225 (SIPRALF) was found to negatively regulate pollen tube elongation *in vitro* [66]. We also  
226 identified a protein involved in oligo-peptide transport (Sopen05g001950) which was  
227 upregulated >28-fold in UI-competent styles and may be involved in the transport/secretion of  
228 peptide hormones such as RALFs.

229 Another gene of interest that was highly upregulated in UI-competent versus  
230 compromised styles was a Kunitz family protease inhibitor (Table 1). In *Nicotiana*, the Kunitz  
231 family protease inhibitor, NaStep, is highly expressed in the pistils of SI species and is thought to  
232 stabilize HT-proteins, although the mechanistic basis of this interaction remains unknown [67].  
233 The NaStep protein is taken up by both compatible and incompatible pollen tubes, and the  
234 transgenic suppression of *NaStep* in SI *Nicotiana* species compromises rejection of both self- and  
235 some types of interspecific pollen tubes [67]. The reduced expression of this gene in UI-  
236 compromised LA0407 may reflect this population's lack of ability to reject some types of  
237 interspecific pollen tubes [1, 6].

238 Although we were most interested in genes showing the highest upregulation in UI-  
239 competent styles, we also analyzed genes that are highly downregulated. We found that three of  
240 the top 25 most highly downregulated genes in UI-competent styles were involved in oxidation-  
241 reduction reactions, and one was putatively involved in defense response (Additional File 1,  
242 Table S5). Notably, five of the top 25 genes downregulated in UI-competent styles are  
243 putatively involved in cell wall modification (Additional File 1, Table S5). These include two  
244 Pectin Lyases (Sopen12g009500 and Sopen01g038750), a Glucosyltransferase

245 (Sopen00g008620) and two Glycosyl Hydrolases (Sopen04g034210 and Sopen07g001240), all  
246 of which were upregulated over 13-fold. Eight additional genes involved in cell wall  
247 modification were downregulated in UI-competent styles, although to lesser extents (Additional  
248 File 1, Table S5).

249 In addition to our analysis of genes that are highly up- or downregulated in UI-competent  
250 versus compromised styles, we investigated the expression of 33 *a priori* candidates (Additional  
251 File 1, Table S6) based on reports in the literature of stylar genes that may be involved in UI [26,  
252 28, 31, 54]. These candidates included genes that were identified in a recent study comparing  
253 stylar transcriptomes between UI-competent *S. pennellii* 0716 and the cultivated tomato *S.*  
254 *lycopersicum* M82 which shows no UI response [54]. Only three of the 33 *a priori* candidates  
255 showed over a 2-fold increase in styles of UI-competent LA1777 versus UI-compromised  
256 LA0407 (Additional File 1, Table S6). These included a Pectin-Methylesterase Inhibitor  
257 (Sopen04g027820, upregulated 2.4-fold) and two Glucosyltransferases (Sopen08g002330 and  
258 Sopen08g002350, both upregulated over 8-fold); however all were expressed at low levels, < 1  
259 cpm. HT-protein, a small asparagine-rich protein required for S-RNase-based UI [33] was  
260 highly expressed in styles from both populations and was downregulated slightly in LA1777  
261 (HT-A, 1.3-fold). Interestingly HT-B transcript was expressed in both populations, although  
262 neither population accumulates functional protein due to an early stop codon in the transcript  
263 [31]. Each individual of LA1777 harbored two unique S-RNase alleles as expected (data not  
264 shown), whereas LA0407 did not express S-RNase transcript, as has been documented in  
265 previous studies [31].

266

267 ***Differential gene expression related to UI-competence in pollen***

268 As coordinated interactions between pollen and pistil are required for successful  
269 fertilization, we also compared pollen transcriptomes between populations. Pollen tubes of  
270 LA1777 reach ovaries of all SI and SC species within the tomato clade [1]. However, LA0407  
271 pollen tubes are rejected by all SI species, including by SI *S. habrochaites* LA1777 [1]. The  
272 inability of LA0407 pollen to traverse the styles of LA1777 and other SI *Solanum* species  
273 suggests that it has lost a pollen factor(s) required for S-RNase resistance. For our analysis, we  
274 therefore considered LA1777 pollen to be UI-competent, and LA0407 pollen to be UI-  
275 compromised.

276 We identified 90 genes that were upregulated in UI-competent pollen (Additional File 1,  
277 Table S7) and 99 that were downregulated (Additional File 1, Table S8). Ten of the top 25 genes  
278 upregulated in UI-competent versus UI-compromised pollen were annotated as hypothetical  
279 proteins (Table 2; Additional File 1, Table S7). Upon further analysis, the hypothetical gene  
280 with the highest upregulation in UI-competent pollen (Sopen12g014190) likely encodes an  
281 arabinogalactan protein (AGP) (Additional File 2, Fig. S2). In *Arabidopsis*, pollen AGPs are  
282 required for proper pollen tube development and growth [68-70], and pistil AGPs are known to  
283 stimulate pollen tube growth [69-72]. We also identified a Rab-GTPase (Rab4A,  
284 Sopen01g033860) that was upregulated nearly 200-fold in UI-competent pollen. Pollen specific  
285 proteins from this family have been found to promote pollen tube tip growth and play a role in  
286 the ability of the pollen tube to sense directional cues [73, 74].

287 Our analysis of pollen also identified differentially expressed genes that may be involved  
288 in protein degradation pathways (Table 2; Additional File 1, Table S7 and Table S8). These  
289 genes are of interest, as components of a pollen SCF (SKP- Cullin-F-box) E3 ubiquitin ligase  
290 complex have been implicated in both SI and UI, and are potentially involved in detoxifying

291 pistil side factors such as S-RNases through the proteasomal degradation pathway [11, 15, 21,  
292 26, 27, 29, 75]. We found two F-box/Skp-2 –like genes (Sopen05g003280 and  
293 Sopen12g022970) that were upregulated over 150-fold in UI-competent pollen (Table 2).  
294 Another gene involved in protein degradation, an aspartyl protease (Sopen01g032940) was  
295 highly upregulated 189-fold in UI-competent pollen (Table 2). No previously identified SLFs  
296 [28] were significantly differentially regulated, nor was the pollen UI factor Cullin1 [26]  
297 (Additional File 1, Table S9).

298 We identified two protein kinases that were upregulated over 50-fold in UI-competent  
299 pollen, one of which encodes a calcium binding serine/threonine wall-associated kinase  
300 (Sopen10g028190), and the other a cysteine-rich receptor like kinase (RLK) (Sopen02g013470)  
301 (Table 2). Because RLKs have a proven role in pollen tube growth [76], these genes are of  
302 potential interest. Further, pollen-expressed RLKs are involved in reception of peptide and  
303 hormone signals from the pistil [77-79].

304 Genes involved in transcriptional regulation are likely to be important components of  
305 pollen tube growth. We identified two types of transcription factors known to play key roles in  
306 stress response [80, 81] that were highly upregulated in UI-competent pollen: a NAC-domain  
307 containing protein (Sopen03g020850) and a bZIP family protein (Sopen12g006170) that has  
308 previously been localized to pollen (Table 2; Additional File 1, Table S7).

309 An analysis of genes that were highly downregulated in UI-competent pollen identified  
310 an F-box Protein (Sopen11g004020) and a Cysteine-rich RLK (Sopen05g014070) that were  
311 downregulated over 45- and 100-fold respectively (Supplemental Table S8). Genes showing  
312 over 100-fold decreases in UI-competent pollen also included two Histone Deacetylases  
313 (HDACs, Sopen11g004040 and Sopen11g004050; Additional File 1, Table S8). The proper

314 function of HDACs has been linked to successful pollen tube germination and tip growth in  
315 *Picea willsoni* [82].

316

### 317 ***UI competence in additional *S. habrochaites* populations***

318 Our initial analyses comparing transcriptomes of LA1777 and LA0407 reproductive  
319 tissues led to some intriguing candidates that might be integral to UI. In an attempt to further  
320 narrow down candidate gene and to expand our analysis to a broader range of *S. habrochaites*  
321 populations, we performed a second RNA-seq experiment that included UP styles and pollen  
322 from *S. habrochaites* populations with selected phenotypes (Table 3; Additional File 1, Table  
323 S10).

324 First we confirmed that the UI phenotypes of the individuals tested reflected previous  
325 results [6] (phenotypes summarized in Table 3). A PCA of all samples shows that much of the  
326 sample variation (1<sup>st</sup> PC) can be explained by tissue type, whereas a smaller percentage of  
327 variation (2<sup>nd</sup> PC) is explained by source population and potentially mating system (Fig. 3).  
328 Interestingly, the additional populations selected for transcriptome analysis, which lie between  
329 LA1777 and LA0407 geographically, cluster between these two populations in the PCA.

330 For each gene, we trained a linear discriminant function for UI-competence on the  
331 expression values for LA1777 and LA0407, and then classified gene expression in other  
332 populations as UI-competent or UI-compromised. We took into account the UI patterns of these  
333 populations with LA0407, as well as previously reported results on interspecific UI ([6],  
334 summarized in Table 3). Because styles of LA2119 are unique in that they accept  
335 interpopulation LA0407 pollen while rejecting interspecific pollen, we interpret the information



336 in Table 4 to reflect the variation in UI phenotype of LA2119 styles (i.e., genes that are up in  
337 LA2119 are top candidates in interspecific UI, whereas genes that are down in LA2119 are top  
338 candidates in interpopulation UI).

339 The top candidates for interspecific UI-competence in styles identified in the linear  
340 discriminant analysis (LDA) included the hypothetical protein Sopen01g011020, that is highly  
341 expressed and upregulated >100-fold (Table 4). Six genes potentially involved in oxidation-  
342 reduction reactions were identified including the NAD(P)-linked Oxidoreductase  
343 (Sopen12g021490), a Cytochrome P450 (Sopen07g030750), a Lipid Oxidoreductase  
344 (Sopen06g026260), a Heavy Metal Transport Protein (Sopen05g028380), a Peroxisomal  
345 Membrane Protein (Sopen03g005470), and the Photosystem I Reaction Center (a Ferredoxin  
346 Oxidoreductase, Sopen12g006800).

347 Top candidates for interpopulation UI-competence in styles identified in the LDA  
348 included two potentially involved in ROS signaling (Table 4). A DELLA-like transcription  
349 factor (Sopen01g0311700) which is responsive to gibberellins [83] and participates in ROS  
350 signaling by regulating ROS accumulation [84], was upregulated 11-fold. A Hemoglobin  
351 Protein (Sopen08g021970) containing redox active transition metals was upregulated 3-fold.  
352 Other interpopulation UI candidates included the cell wall synthesis protein Alpha-1,4-Glucan-  
353 Protein Synthase (Sopen05g006860), an Alpha/beta Hydrolase family protein  
354 (Sopen11g005210), a P-Glycoprotein ABC Transporter-like protein (Sopen08g025270) and an  
355 F-box-LRR Protein (Sopen12g006260).

356 The LDA of pollen genes was more straightforward in that LA2119 and LA1264 were  
357 expected to be UI-competent (i.e., similar to LA1777) whereas LA1223 is UI-compromised and  
358 may be missing pollen factor(s) required to traverse SI styles. As shown in Table 5, using the

359 LDA we identified 22 genes that were upregulated in UI-competent pollen. Two of these encode  
360 F-box proteins that are both putatively involved in the ubiquitin ligase complex  
361 (Sopen03g040880 and Sopen01g027170) and were both upregulated over 25-fold. In addition, a  
362 RAPTOR/KOG kinase homolog that is associated with the CUL4 RING ubiquitin ligase  
363 complex (Sopen10g027930) was upregulated 12-fold in UI-competent pollen, and an annexin-  
364 like calcium binding protein (Sopen05g030530) putatively involved in calcium signaling and  
365 polysaccharide transport was upregulated over 4-fold. Two transcription factors were also  
366 identified in the analysis: Sopen12g027920 encodes a suppressor of FRI1 that may act to recruit  
367 histone H3 methyltransferases and Sopen11g020250 encodes a zinc finger transcription factor.

## 368 **Discussion**

369 Although UI is widespread in plant families, the underlying molecular basis of this  
370 unidirectional reproductive barrier is not well understood. Here, using a transcriptomic  
371 approach, we identified genes in both pollen and stelar tissues that represent strong candidates  
372 for involvement in UI. Overall, our analyses identified a large number of differentially  
373 expressed genes that are involved in oxidation-reduction reactions and ROS signaling. Oxidative  
374 stress responses are involved in a variety of plant physiological processes, including  
375 reproduction [57, 59, 85-87]. The production of ROS in plants generally results in one of two  
376 outcomes: adaptation to stress or programmed cell death [85]. The balanced interplay between  
377 pollen and pistil ROS production can display either of these results: signaling and detoxification  
378 are required for successful fertilization (adaptation to stress) and can also function in the  
379 incompatible (SI) response (cell death of incompatible pollen tubes). For example, in the  
380 Papaveraceae family ROS are recognized as key regulators of programmed cell death in  
381 incompatible (self) pollen tubes [63, 88] and recent studies of Rosaceae family member *Pyrus*

382 *pyrifolia* have demonstrated a link between ROS accumulation, Ca<sup>2+</sup> signaling, calmodulin levels  
383 and actin filament depolymerization during self-pollen tube rejection [62, 89]. One of the first  
384 indications that ROS might be involved in pollen tube growth and cross-compatibilities in the  
385 Solanaceae came from histochemical staining in styles *Petunia hybrid*, which demonstrated that  
386 peroxidase activity is found in unpollinated styles and decreases following compatible  
387 pollinations, but remains high during incompatible self-pollinations [90]. This pattern is also  
388 observed in an analysis of cytochrome P450 (CYP51G1-Sc) in the wild potato *S. chacoense*,  
389 where in compatible pollinations, mRNA levels of CYP51G1-Sc declines, but in incompatible  
390 (self) pollinations, levels of this cytochrome remain stable.

391         In our pairwise comparisons investigating changes between UP and pollinated styles, we  
392 found increases in ROS pathway members in incompatible interpopulation pollinations  
393 (Additional File 1, Table S3) but not incompatible self-pollinations (Additional File 1, Table S1)  
394 or compatible intrapopulation pollinations (Additional File 1, Table S2). For instance, an H<sub>2</sub>O<sub>2</sub>  
395 transporter was upregulated over 16-fold only in incompatible interpopulation pollinations.  
396 These transporters generally pump reactive H<sub>2</sub>O<sub>2</sub> into the apoplast, an acidic environment with  
397 low numbers of ROS scavengers, resulting in oxidative stress [85]. A K<sup>+</sup> channel and a Ca<sup>2+</sup>-  
398 binding annexin protein, both of which were annotated as being pollen-expressed were also  
399 upregulated in interpopulation interactions, as was a Rab-GTPase. All three of these proteins can  
400 play important roles in ROS generation and signaling. In pollen tubes, annexins may provide an  
401 important link between Ca<sup>2+</sup>, the membrane and the cytoskeleton [91]. Further, many annexins  
402 form Ca<sup>2+</sup> channels which are vital not only for the oscillating Ca<sup>2+</sup> influx associated with pollen  
403 tube tip growth, but also for facilitating ROS signaling, cell elongation and cell wall remodeling  
404 [85, 92]. Interestingly, SKOR K<sup>+</sup> channels like the one identified in our analysis can also act as

405 ROS-activated  $\text{Ca}^{2+}$  channels [92]. Small GTPases, including Rabs, increase NADP(H)-oxidase  
406 activity in a  $\text{Ca}^{2+}$ -dependent manner [58, 93], and their proper function is required for pollen  
407 tube growth [58, 60, 73, 74, 94]. For example, the overexpression of both active and mutant  
408 forms of the RAB11 protein leads to the inhibition of pollen tube growth in *Nicotiana* [74]  
409 suggesting that the correct balance of multiple Rabs is required for effective pollen tube growth.

410 In UI-competent styles, ten of the top 25 most highly upregulated genes are putatively  
411 involved in ROS generation and/or signaling, including an NADP(H)-oxidase and multiple  
412 cytochrome P450s (Table 1). We also identified two highly upregulated gene candidates in the  
413 flavonoid pathway, which could produce flavonoid compounds to act as pro- or anti-oxidants  
414 (Table 1). In our subsequent analysis using transcriptome data from additional *S. habrochaites*  
415 populations, we found that six of the nine candidate stylar genes that may be involved in  
416 interspecific UI were ROS pathway genes (Table 4). Surprisingly, only two ROS-linked genes  
417 were upregulated in interpopulation UI-competent styles, one of which encodes a DELLA-like  
418 transcription factor that inhibits ROS accumulation and restrains cell expansion [83, 84]. In sum,  
419 these results suggest a dynamic interplay between pollen and pistil that must be held in a tight  
420 balance for pollen tubes to successfully grow through styles to reach the ovary.

421 The generation of ROS is linked to cell expansion, growth, cell wall cross linking and  
422 callose deposition [95]. Pollen tube walls consist of a number of polymers (callose, cellulose  
423 and pectin) that are highly cross-linked to each other; however the mechanisms by which cell  
424 wall modification is regulated remains unclear [96-98]. Studies using microarray analysis have  
425 found an upregulation of cell-wall modification genes in pollinated versus unpollinated styles  
426 [51]. However, few have specifically investigated specificity to the SI or UI response (but see  
427 Pease et al. [54]). Using electron microscopy, de Nettancourt et al [99] found differences in

428 callose deposition between SI and UI crosses in *S. peruvianum* wherein SI crosses showed large  
429 levels of callose deposition at the pollen tube tips, but interspecific crosses did not [99]. Our  
430 pairwise comparisons in UP versus pollinated LA1777 styles did not reveal any genes involved  
431 in cell wall modification. However, we did identify a number of differentially expressed genes  
432 involved in cell wall modification in our larger analysis of styler tissue (Additional File 1, Table  
433 S4 and Table S5), most of which were highly downregulated in UI-competent styles.

434         One of the most intriguing gene candidates from our analysis of styler tissue included a  
435 putative RALF peptide hormone (Sopen02g033850) that was upregulated over 22-fold in UI-  
436 competent styles. Peptide hormone signaling is involved in numerous processes during pollen-  
437 pistil interactions, from pollen hydration to fertilization [77]. A tomato RALF has been shown to  
438 reduce pollen tube growth during specific windows of development [66], and therefore a styler-  
439 secreted RALF could play a role in the rejection of interspecific pollen tubes. Another  
440 interesting style-expressed candidate to pursue is the Kunitz-like Protease Inhibitor that was  
441 upregulated in UI-competent styles. The *Nicotiana* NaStep protein from this family is required  
442 for the rejection of some (but not all) interspecific pollen [67], and this protease inhibitor may  
443 play a similar role in *S. habrochaites* UI. Finally, the most highly-upregulated styler gene  
444 identified in UI-competent styles encodes a putative prenylated heavy-metal binding protein  
445 (Additional File 2, Fig. S2), that may be worthy of further investigation. Other proteins of this  
446 type have been identified in a variety of tissues, and the few that have been characterized have  
447 been implicated in stress response [100].

448         In UI-competent pollen, we identified a highly upregulated putative AGP  
449 (Sopen12g014190) (Table 2) that contains a signal peptide, a hydrophobic C-terminal domain,  
450 eight dipeptides that are found in known AGPs and is composed of > 35% Pro/Ala/Ser/Thr

451 (PAST) amino acids: a defining characteristic of AGPs (Additional File 2, Fig. S2; [70, 101]). In  
452 *Arabidopsis*, pollen AGPs are required for pollen tube growth, and may be involved in complex  
453 signaling cascades [68-70], and pollen AGPs have been localized to pollen tube tips in some  
454 species [102]. Another gene that warrants further study is a Rab-GTPase (Sopen01g033860) that  
455 was upregulated nearly 200-fold in UI-competent pollen. It will be interesting to see if  
456 increasing the expression of these genes in UI-compromised pollen is able to increase rates of  
457 pollen tube growth through SI styles.

## 458 ***Conclusions***

459 Our analyses revealed differentially expressed genes that may contribute to reproductive  
460 incompatibility between populations of *S. habrochaites*. This work represents an important first  
461 step in understanding how unilateral barriers might arise between populations, and how they are  
462 maintained during speciation. The variability in UI responses between *S. habrochaites*  
463 populations provides an exciting opportunity in which to further analyze these candidate genes  
464 and link them to specific UI phenotypes.

465

## 466 **Materials and Methods**

### 467 ***Solanum habrochaites plant material and growth***

468 *Solanum habrochaites* (S. Knapp & D. M. Spooner) is a wild relative of tomato that  
469 demonstrates variability in mating system [41, 44], as well as interspecific [31, 35] and  
470 interpopulation [1, 6-8] cross-compatibilities. Seeds from the *S. habrochaites* accessions  
471 (referred to hereafter as populations) used in this study (Table 3) were acquired from the C.M.  
472 Rick Tomato Genetic Resource Center (TGRC) at University of California, Davis

473 (www.tgrc.ucdavis.edu, [103]), sterilized according to recommendations from the TGRC, grown  
474 under greenhouse conditions as previously described [1] for approximately 3 weeks, and  
475 transplanted in covered outdoor agricultural field plots at Colorado State University. Plants used  
476 in the study were randomized within a single block, and remained large and healthy throughout  
477 the experiment. Specific populations were chosen based on reproductive characteristics as  
478 described in Broz et al., 2016 [6], see Table 3 for more information.

479

#### 480 ***Pollen tube growth phenotypes***

481 Pollen tube growth through the style was assessed for self, intrapopulation and reciprocal  
482 interpopulation crosses of *S. habrochaites* individuals, although for LA0407, self and  
483 intrapopulation crosses consistently resulted in fruit-set, so pollen tube growth was not assessed  
484 for every individual. For all crosses, buds were emasculated 1 day prior to anthesis (day -1),  
485 hand-pollinated 24 hours later (day 0, budbreak), and harvested into fixative (1:3 acetoethanol)  
486 48 h after pollination. For crosses between LA1777 (female) and LA0407 (male), styles were  
487 harvested at various time points after pollination (12, 24 and 48 h) to determine the time at which  
488 pollen tube rejection occurred. Pollinations were typically performed in the late afternoon and  
489 collected the following morning. However, pollen tube growth through styles was similar for  
490 pollinations performed in both the morning and the afternoon (data not shown).

491 Pollinations were covered with mesh bags to prevent unintended pollen deposition by  
492 pollinators. Pollen tube growth was assessed using fluorescence microscopy as previously  
493 described [31], and the length of styles and the point in the style at which no more than three  
494 pollen tubes passed were measured using ImageJ 1.47v (<http://rsb.info.nih.gov/ij/>; [104]).

495

496 ***Tissue collection, RNA extraction and library construction***

497           The primary RNA-seq experiment was performed to identify genes involved in  
498 interpopulation pollen tube rejection observed in crosses between LA1777 females and LA0407  
499 males. Samples consisted of unpollinated styles, pollinated styles (self-pollination,  
500 intrapopulation pollination, or interpopulation pollination), and pollen (Fig. 1; Additional File 1,  
501 Table S10) – resulting in five treatment/tissue types for each individual. Three individuals from  
502 each population were used as biological replicates, resulting in a total of 30 libraries. In a  
503 follow-up experiment designed to narrow the list of genes involved in interpopulation  
504 interactions, RNA samples from between one and three individuals were pooled at an equimolar  
505 ratio before library creation (Additional File 1, Table S10).

506           For all style samples, flowers were emasculated and pollinated as described above for  
507 pollen tube growth experiments and harvested 16 hrs post-pollination (the approximate time at  
508 which pollen tube rejection occurred in interpopulation crosses). Unpollinated controls  
509 underwent the same treatment (emasculatation at day -1), except they were left unpollinated. For  
510 each individual plant, approximately 30 styles were collected for each treatment and pooled  
511 before RNA extraction. To minimize variation due to environmental conditions, all treatments  
512 were conducted on the same days and harvested at approximately the same time of day. Styles  
513 (including stigmas) were harvested directly into RNALater (Qiagen) and stored at 4° C for one  
514 week, after which styles were blotted dry and immediately frozen at -80° C until processing.  
515 Approximately 100 mg of pollen was harvested from each individual plant and immediately  
516 frozen at -80° C.

517           Tissues were ground using the Tissue-lyser (Qiagen), RNA was extracted using the  
518 Qiagen RNeasy Plant mini-kit and brought to a final concentration of 70-200 ng/uL. A subset of



519 RNA samples was checked for quality by agarose gel electrophoresis and visualization by  
520 ethidium bromide staining. Sample quality was further evaluated using the Agilent 2200 RNA  
521 TapeStation system before library creation. Stranded, paired-end libraries of total RNA were  
522 generated for each sample using Illumina Truseq Stranded mRNA sample preparation kits.  
523 Libraries were pooled and distributed evenly across two lanes of Illumina HiSeq™ 2000  
524 (Illumina Inc., San Diego, CA, USA). RNA quality control, library preparation, and pooling  
525 were performed by the Indiana University Center for Genomics and Bioinformatics. The raw  
526 transcriptome data is available on the NCBI SRA database (BioProject SRP069274).

527

### 528 ***RNA-seq read processing and mapping***

529         Prior to mapping and assembly, reads were trimmed and filtered using the SHEAR  
530 program (<http://www.github.com/jbpease/shear>; [54]). Briefly, SHEAR first uses the Scythe  
531 algorithm (<https://github.com/vsbuffalo/scythe>; [105]) to remove adapters from the 3' end, and  
532 then filters low quality reads (mean Q<10), reads with >7 ambiguous bases (N's), reads < 50 bp,  
533 and repetitive reads with mutual information score > 0.5. The program then trims reads on both  
534 ends by removing low quality bases (Q<20), poly-A or poly-T runs of  $n \geq 12$ , and ambiguous  
535 bases. The appearance of AGATC at the 3' end was also removed as we presumed it was an  
536 adapter fragment. We removed both reads in a pair if either one of them failed the filters. On  
537 average, 2.9% of all reads failed to pass the filter (min 2.5%, max 3.4%). The full command and  
538 parameters used for SHEAR can be found in Additional File 2, Method S1.

539         We mapped RNA-seq reads to the *Solanum pennellii* reference genome using the STAR  
540 spliced aligner with default parameters [106]. The reference genome sequence and the genome  
541 annotation (Spenn v2.0) were downloaded from solgenomics.net [107]. On average across

542 libraries, 81% of reads mapped uniquely to the reference genome. We counted reads mapped to  
543 the reference gene annotation and to unannotated putative S-locus F-box (SLF) genes [28] (a  
544 total of 48938 genic regions) using featureCounts v1.4.5-p1 [108]. A total of 663185500 read  
545 pairs were counted (72% of raw reads). For genes annotated as ‘hypothetical’ in Spenn v2.0  
546 [107], further sequence alignments were carried out using NCBI BLAST searches  
547 (<https://blast.ncbi.nlm.nih.gov>; [109]).

548

### 549 ***Differential gene expression analysis***

550 For all tests of differential expression we used linear models implemented by the *limma*  
551 package [110, 111] and modules from the edgeR package [112] in R [113]. First, we normalized  
552 and transformed the raw reads with *voom*, a weighted transformation based on the expected  
553 relationship between expression mean and variance [111]. We computed *t*-statistics on the  
554 transformed expression values for each gene using an empirical Bayes adjustment of standard  
555 errors with the *eBayes* function [110].

556 We initially searched for differential expression among stylar tissues by carrying out  
557 separate pairwise comparisons. Specifically, we compared the following pairs of style treatments  
558 in LA1777: intrapopulation-pollinated (compatible) against unpollinated (UP) styles, self-  
559 pollinated (incompatible) against UP styles and interpopulation (incompatible) against UP styles.

560 We visualized the genome-wide patterns of expression through a PCA of the normalized  
561 mean read counts per gene (cpm reads in the library) with the *prcomp* function (implemented in  
562 R; [113]). The PCA showed that there were negligible differences at the genome-wide scale  
563 among all style treatments within a population (Fig. 3; Additional File 2, Fig. S1). Because of  
564 these high consistencies in their gene expression profiles, all style treatments (UP, self-, intra-

565 and interpopulation pollinated) within a population were considered identical in our linear  
566 models that focus on the differences between UI-competent (LA1777) and UI-compromised  
567 (LA0407) styles.

568 We identified genes that are differentially expressed in UI-competent tissues using a  
569 linear model with a single fixed effect (collinear with the population of origin) for pollen (n=6)  
570 and styles (n = 24) separately. From these models, we took genes as differentially expressed if  
571 they showed large differences in expression (> 3-fold change), with statistical significance at a  
572 false discovery rate (FDR) of 5%. Further, we considered only tissue-specific genes: we required  
573 genes to have a significant (FDR < 5%) tissue effect in a general linear model  $Y \sim P + T + e$   
574 (where  $P$  is a population effect,  $T$  is a tissue effect, and  $e$  is the error term). For stylar-side  
575 factors, we included genes as differentially expressed if they were upregulated in styles with  
576 respect to pollen, and vice versa for pollen-side factors. This last filter ensured that differences in  
577 styles were unlikely to be contributed by pollen in the styles of pollinated samples.

578 A number of *a priori* pollen and pistil UI candidate genes were selected based on  
579 information from previous publications [23, 26, 28, 31, 54]. Some of the SLF genes have not yet  
580 been annotated in the *S. pennellii* genome, so we used locus numbers and sequences from Li and  
581 Chetelat (2015) [28] to find these genes in our dataset. We identified expression levels of all *a*  
582 *priori* candidates, and carried out statistical tests similar to the ones described above to determine  
583 whether they were differentially expressed.

584

### 585 ***Acknowledgements***

586 The authors thank the Charles M. Rick Tomato Genetics Resource Center for seeds, J. Pease, M.  
587 Wu, and L. Moyle for assistance with the analysis, A. Ashford for plant care and O. Todd, T.  
588 Randall, and A. Martin for help compositing microscopic images. This work was supported by  
589 grant numbers DBI-0605200 and MCB-1127059 from the Plant Genome Research Program of  
590 the National Science Foundation.

591

## 592 **Funding**

593 This work was supported by grant numbers DBI-0605200 and MCB-1127059 from the Plant  
594 Genome Research Program of the National Science Foundation.

595

## 596 **Authors' contributions**

AB performed RNA extraction, analyzed and interpreted data and wrote the manuscript with editing contributions from all authors. RG performed all bioinformatics and statistical analyses of the data. AR designed and performed crossing experiments and collected tissue. YB performed crossing experiments and collected tissue. MH designed experiments, oversaw bioinformatics experiments and assisted in data analysis. PB conceived and designed experiments, collected tissue and interpreted data. All authors read and approved the manuscript.

## **References**

1. Baek YS, Covey PA, Petersen JJ, Chetelat RT, McClure B, Bedinger PA: **Testing the S1 x SC rule: Pollen-pistil interactions in interspecific crosses between members of the tomato clade (Solanum section Lycopersicon, Solanaceae).** *Am J Bot* 2015, **102**(2):302-311.
2. de Nettancourt D: **Incompatibility and incongruity in wild and cultivated plants.** Berlin: Springer; 2001.
3. Hogenboom NG: **Model for incongruity in intimate partner relationships.** *Euphytica* 1973, **22**(2):219-233.
4. Lewis D, Crowe LK: **Unilateral interspecific incompatibility in flowering plants.** *Heredity* 1958, **12**:233-256.
5. Martin FW: **Genetic control of unilateral incompatibility between two tomato species.** *Genetics* 1967, **56**:391-398.
6. Broz AK, Randle AM, Sianta SA, Tovar-Méndez A, McClure B, Bedinger PA: **Mating system transitions in Solanum habrochaites impact interactions between populations and species.** *New Phytol* 2016. DOI: 10.1111/nph.14130
7. Martin FW: **Distribution and interrelationships of incompatibility barriers in Lycopersicon hirsutum humb. and bonpl. complex.** *Evolution* 1963, **17**(4):519-528.
8. Martin FW: **Inheritance of unilateral incompatibility in Lycopersicon hirsutum.** *Genetics* 1964, **50**(3):459-469.
9. Rick CM, Chetelat RT: **The breakdown of self-incompatibility in Lycopersicon hirsutum.** In: *Solanaceae III: Taxonomy, Chemistry, Evolution.* Edited by Hawkes L, Nee, Estrada. London: Royal Botanic Gardens Kew and Linnean Society of London; 1991: 253-256.
10. Silva NF, Goring DR: **Mechanisms of self-incompatibility in flowering plants.** *Cell Mol Life Sci* 2001, **58**(14):1988-2007.
11. McClure B, Cruz-Garcia F, Romero C: **Compatibility and incompatibility in S-RNase-based systems.** *Ann Bot* 2011, **108**(4):647-658.
12. McClure BA, Haring V, Ebert PR, Anderson MA, Simpson RJ, Sakiyama F, Clarke AE: **Style self-incompatibility gene-products of Nicotiana glauca are ribonucleases.** *Nature* 1989, **342**(6252):955-957.

13. Chapman LA, Goring DR: **Pollen-pistil interactions regulating successful fertilization in the Brassicaceae.** *J Exp Bot* 2010, **61**(7):1987-1999.
14. Takayama S, Isogai A: **Self-incompatibility in plants.** *Ann Rev Plant Biol* 2005, **56**(1):467-489.
15. Entani T, Kubo K-i, Isogai S, Fukao Y, Shirakawa M, Isogai A, Takayama S: **Ubiquitin-proteasome-mediated degradation of S-RNase in a solanaceous cross-compatibility reaction.** *Plant J* 2014, **78**(6):1014-1021.
16. Kao TH, Tsukamoto T: **The molecular and genetic bases of S-RNase-based self-incompatibility.** *Plant Cell* 2004, **16** Suppl:S72-83.
17. Swanson R, Edlund AF, Preuss D: **Species specificity in pollen-pistil interactions.** *Ann Rev Genetics* 2004, **38**(1):793-818.
18. Kubo K, Entani T, Takara A, Wang N, Fields AM, Hua Z, Toyoda M, Kawashima S, Ando T, Isogai A *et al*: **Collaborative non-self recognition system in S-RNase-based self-incompatibility.** *Science* 2010, **330**(6005):796-799.
19. Sijacic P, Wang X, Skirpan AL, Wang Y, Dowd PE, McCubbin AG, Huang S, Kao TH: **Identification of the pollen determinant of S-RNase-mediated self-incompatibility.** *Nature* 2004, **429**(6989):302-305.
20. Wang N, Kao TH: **Self-incompatibility in Petunia: a self/nonself-recognition mechanism employing S-locus F-box proteins and S-RNase to prevent inbreeding.** *Wiley Interdisciplinary Rev Dev Bio* 2012, **1**(2):267-275.
21. Williams JS, Wu L, Li S, Sun P, Kao TH: **Insight into S-RNase-based self-incompatibility in Petunia: recent findings and future directions.** *Front Plant Sci* 2015, **6**:41.
22. Hancock CN, Kent L, McClure BA: **The stylar 120 kDa glycoprotein is required for S-specific pollen rejection in Nicotiana.** *Plant J* 2005, **43**(5):716-723.
23. McClure B, Mou BQ, Canevascini S, Bernatzky R: **A small asparagine-rich protein required for S-allele-specific pollen rejection in Nicotiana.** *Proc Natl Acad Sci USA* 1999, **96**(23):13548-13553.
24. O'Brien M, Kapfer C, Major G, Laurin M, Bertrand C, Kondo K, Kowyama Y, Matton DP: **Molecular analysis of the stylar-expressed Solanum chacoense small asparagine-rich protein family related to the HT modifier of gametophytic self-incompatibility in Nicotiana.** *Plant J* 2002, **32**(6):985-996.
25. Hua Z, Kao T-h: **Identification and characterization of components of a putative Petunia S-locus F-box-containing E3 ligase complex involved in S-RNase-based self-incompatibility.** *Plant Cell* 2006, **18**(10):2531-2553.
26. Li W, Chetelat RT: **A pollen factor linking inter- and intraspecific pollen rejection in tomato.** *Science* 2010, **330**(6012):1827-1830.
27. Li W, Chetelat RT: **The role of a pollen-expressed Cullin1 protein in gametophytic self-incompatibility in Solanum.** *Genetics* 2014, **196**(2):439-442.
28. Li W, Chetelat RT: **Unilateral incompatibility gene ui1.1 encodes an S-locus F-box protein expressed in pollen of Solanum species.** *Proc Natl Acad Sci USA* 2015, **112**(14):4417-4422.
29. Qiao H, Wang HY, Zhao L, Zhou JL, Huang J, Zhang YS, Xue YB: **The F-box protein AhSLF-S-2 physically interacts with S-RNases that may be inhibited by the ubiquitin/26S proteasome pathway of protein degradation during compatible pollination in Antirrhinum.** *Plant Cell* 2004, **16**(3):582-595.

30. Bernacchi D, Tanksley SD: **An interspecific backcross of *Lycopersicon esculentum* x *L. hirsutum*: Linkage analysis and a QTL study of sexual compatibility factors and floral traits.** *Genetics* 1997, **147**(2):861-877.
31. Covey PA, Kondo K, Welch L, Frank E, Sianta S, Kumar A, Nunez R, Lopez-Casado G, van der Knaap E, Rose JKC *et al*: **Multiple features that distinguish unilateral incongruity and self-incompatibility in the tomato clade.** *Plant J* 2010, **64**(3):367-378.
32. Murfett J, Strabala TJ, Zurek DM, Mou BQ, Beecher B, McClure B: **S-RNase and interspecific pollen rejection in the genus *Nicotiana*: multiple pollen-rejection pathways contribute to unilateral incompatibility between self-incompatible and self-compatible species.** *Plant Cell* 1996, **8**(6):943-958.
33. Tovar-Mendez A, Kumar A, Kondo K, Ashford A, Baek YS, Welch L, Bedinger PA, McClure BA: **Restoring pistil-side self-incompatibility factors recapitulates an interspecific reproductive barrier between tomato species.** *Plant J* 2014, **77**(5):727-736.
34. Liedl BE, McCormick S, Mutschler MA: **Unilateral incongruity in crosses involving *Lycopersicon pennellii* and *L. esculentum* is distinct from self-incompatibility in expression, timing and location.** *Sex Plant Reprod* 1996, **9**:299-308.
35. Martin FW: **Complex unilateral hybridization in *Lycopersicon hirsutum*.** *Proc Natl Acad Sci USA* 1961, **47**(6):855-857.
36. Hogenboom NG, Mather K: **Incompatibility and incongruity: Two different mechanisms for the non-functioning of intimate partner relationships.** *Proc R Soc Lond B: Biol Sci* 1975, **188**(1092):361-375.
37. Bedinger PA, Chetelat RT, McClure B, Moyle LC, Rose JKC, Stack SM, van der Knaap E, Baek YS, Lopez-Casado G, Covey PA *et al*: **Interspecific reproductive barriers in the tomato clade: opportunities to decipher mechanisms of reproductive isolation.** *Sex Plant Reprod* 2011, **24**(3):171-187.
38. Iqbal B, Bohs L, Kohn JR: **Ancient polymorphism reveals unidirectional breeding system shifts.** *Proc Natl Acad Sci USA* 2006, **103**(5):1359-1363.
39. Iqbal B, Kohn JR: **The distribution of plant mating systems: Study bias against obligately outcrossing species.** *Evolution* 2006, **60**(5):1098-1103.
40. Pease JB, Haak DC, Hahn MW, C. ML: **Phylogenomics reveals three sources of adaptive variation during a rapid radiation.** *PLoS Biology* 2016, **14**(2):e1002379.
41. Peralta I, Spooner M, Knapp S: **Taxonomy of wild tomatoes and relatives (*Solanum* sect. *Lycopersicoides*, sect. *Juglandifolia*, sect. *Lycopersicon*).** *Systematic Botany Monographs* 2008, **84**.
42. Rick CM: **Biosystematic studies in *Lycopersicon* and closely related species of *Solanum*.** In: *The Biology and Taxonomy of the Solanaceae* Edited by J.G. Hawkes RNLADS: Linnean Soc; 1979.
43. Rick CM: **Reproductive isolation in the *Lycopersicon peruvianum* complex.** In: *Solanaceae, Biology and Systematics.* Edited by D'Arcy WG. New York: Columbia University Press; 1986: 477-495.
44. Rick CM, Fobes JF, Tanksley SD: **Evolution of mating systems in *Lycopersicon hirsutum* as deduced from genetic-variation in electrophoretic and morphological characters.** *Plant Syst Evol* 1979, **132**(4):279-298.

45. Kondo K, Yamamoto M, Itahashi R, Sato T, Egashira H, Hattori T, Kowyama Y: **Insights into the evolution of self-compatibility in *Lycopersicon* from a study of stylar factors.** *Plant J* 2002, **30**.
46. Sifres A, Blanca J, Nuez F: **Pattern of genetic variability of *Solanum habrochaites* in its natural area of distribution.** *Genet Resour Crop Evo* 2011, **58**(3):347-360.
47. Mutschler M, Liedl B: **Interspecific crossing barriers in *Lycopersicon* and their relationship to self-incompatibility.** In: *Genetic Control of Self-Incompatibility and Reproductive Development in Flowering Plants*. Edited by Williams E. Netherlands: Kluwer Academic; 1994: 164-188.
48. Sacks EJ, St Clair DA: **Variation among seven genotypes of *Lycopersicon esculentum* and 36 accessions of *L. hirsutum* for interspecific crossability.** *Euphytica* 1998, **101**(2):185-191.
49. Beecher B, Zurek D, McClure B: **Effects of RNases on rejection of pollen from *Nicotiana tabacum* and *N. plumbaginifolia*.** *Sex Plant Reprod* 2001, **14**(1-2):69-76.
50. Becker JD, Boavida LC, Carneiro J, Haury M, Feijó JA: **Transcriptional profiling of *Arabidopsis* tissues reveals the unique characteristics of the pollen transcriptome.** *Plant Physiol* 2003, **133**(2):713-725.
51. Boavida LC, Borges F, Becker JD, Feijó JA: **Whole genome analysis of gene expression reveals coordinated activation of signaling and metabolic pathways during pollen-pistil interactions in *Arabidopsis*.** *Plant Physiol* 2011, **155**(4):2066-2080.
52. Honys D, Twell D: **Comparative analysis of the *Arabidopsis* pollen transcriptome.** *Plant Physiol* 2003, **132**(2):640-652.
53. Qin Y, Leydon AR, Manziello A, Pandey R, Mount D, Denic S, Vasic B, Johnson MA, Palanivelu R: **Penetration of the stigma and style elicits a novel transcriptome in pollen tubes, pointing to genes critical for growth in a pistil.** *PLoS Genet* 2009, **5**(8):e1000621.
54. Pease JB, Guerrero RF, Sherman NA, Hahn MW, Moyle LC: **Molecular mechanisms of postmating prezygotic reproductive isolation uncovered by transcriptome analysis.** *Mol Eco* 2016, **25**(11):2592-2608.
55. Yoo KS, Ok SH, Jeong BC, Jung KW, Cui MH, Hyoung S, Lee MR, Song HK, Shin JS: **Single cystathionine beta-synthase domain-containing proteins modulate development by regulating the thioredoxin system in *Arabidopsis*.** *Plant Cell* 2011, **23**(10):3577-3594.
56. Zhong X, Hale CJ, Law JA, Johnson LM, Feng S, Tu A, Jacobsen SE: **DDR complex facilitates global association of RNA polymerase V to promoters and evolutionarily young transposons.** *Nat Struct Mol Biol* 2012, **19**(9):870-875.
57. Jimenez-Quesada MJ, Traverso JA, Alche Jde D: **NADPH Oxidase-dependent superoxide production in plant reproductive tissues.** *Front Plant Sci* 2016, **7**:359.
58. Nibau C, Wu HM, Cheung AY: **RAC/ROP GTPases: 'hubs' for signal integration and diversification in plants.** *Trends Plant Sci* 2006, **11**(6):309-315.
59. Potocky M, Jones MA, Bezvoda R, Smirnoff N, Zarsky V: **Reactive oxygen species produced by NADPH oxidase are involved in pollen tube growth.** *New Phytol* 2007, **174**(4):742-751.
60. Potocky M, Pejchar P, Gutkowska M, Jimenez-Quesada MJ, Potocka A, Alche Jde D, Kost B, Zarsky V: **NADPH oxidase activity in pollen tubes is affected by calcium**

- ions, signaling phospholipids and Rac/Rop GTPases. *J Plant Physiol* 2012, **169**(16):1654-1663.**
61. Steinhorst L, Kudla J: **Calcium - a central regulator of pollen germination and tube growth.** *Biochim Biophys Acta* 2013, **1833**(7):1573-1581.
  62. Wang C-L, Wu J, Xu G-H, Gao Y-b, Chen G, Wu J-Y, Wu H-q, Zhang S-L: **S-RNase dsirupts tip-localized reactive oxygen species and induces nuclear DNA degradation in incompatible pollen tubes of *Pyrus pyrifolia*.** *J Cell Sci* 2010, **123**(24):4301-4309.
  63. Bosch M, Franklin-Tong VE: **Self-incompatibility in *Papaver*: signalling to trigger PCR in incompatible pollen.** *J Exp Bot* 2008, **59**:481-490.
  64. Dresselhaus T, Márton ML: **Micropylar pollen tube guidance and burst: adapted from defense mechanisms?** *Cur Opinion Plant Biol* 2009, **12**(6):773-780.
  65. Murphy E, De Smet I: **Understanding the RALF family: a tale of many species.** *Trends in Plant Sci* 2014, **19**(10):664-671.
  66. Covey PA, Subbaiah CC, Parsons RL, Pearce G, Lay FT, Anderson MA, Ryan CA, Bedinger PA: **A Pollen-Specific RALF from Tomato That Regulates Pollen Tube Elongation.** *Plant Physiol* 2010, **153**(2):703-715.
  67. Jimenez-Duran K, McClure B, Garcia-Campusano F, Rodriguez-Sotres R, Cisneros J, Busot G, Cruz-Garcia F: **NaStEP: a proteinase inhibitor essential to self-incompatibility and a positive regulator of HT-B stability in *Nicotiana alata* pollen tubes.** *Plant Physiol* 2013, **161**(1):97-107.
  68. Coimbra S, Costa M, Jones B, Mendes MA, Pereira LG: **Pollen grain development is compromised in *Arabidopsis agp6 agp11* null mutants.** *J Exp Bot* 2009, **60**(11):3133-3142.
  69. Pereira AM, Pereira LG, Coimbra S: **Arabinogalactan proteins: rising attention from plant biologists.** *Plant Reprod* 2015, **28**(1):1-15.
  70. Ellis M, Egelund J, Schultz CJ, Bacic A: **Arabinogalactan-Proteins: Key regulators at the cell surface?** *Plant Physiol* 2010, **153**:403-419.
  71. Cheung AY, Wang H, Wu H: **A floral transmitting tissue-specific glycoprotein attracts pollen tubes and stimulates their growth.** *Cell* 1995, **82**(3):383-393.
  72. Wu H-m, Wong E, Ogdahl J, Cheung AY: **A pollen tube growth-promoting arabinogalactan protein from *Nicotiana alata* is similar to the tobacco TTS protein.** *Plant J* 2000, **22**(2):165-176.
  73. Chen CY, Cheung AY, Wu HM: **Actin-depolymerizing factor mediates Rac/Rop GTPase-regulated pollen tube growth.** *Plant Cell* 2003, **15**(1):237-249.
  74. de Graaf BHJ, Cheung AY, Andreyeva T, Lévasseur K, Kieliszewski M, Wu H-m: **Rab11 GTPase-Regulated membrane trafficking is crucial for tip-focused pollen tube growth in tobacco.** *Plant Cell* 2005, **17**(9):2564-2579.
  75. Zhang Y, Zhao Z, Xue Y: **Roles of proteolysis in plant self-incompatibility.** *Ann Rev Plant Biol* 2009, **60**:21-42.
  76. Zhang D, Wengier D, Shuai B, Gui CP, Muschiatti J, McCormick S, Tang WH: **The pollen receptor kinase LePRK2 mediates growth-promoting signals and positively regulates pollen germination and tube growth.** *Plant Physiol* 2008, **148**(3):1368-1379.
  77. Kanaoka MM, Higashiyama T: **Peptide signaling in pollen tube guidance.** *Cur Opinion Plant Biol* 2015, **28**:127-136.
  78. Takeuchi H, Higashiyama T: **Tip-localized receptors control pollen tube growth and LURE sensing in *Arabidopsis*.** *Nature* 2016, **531**(7593):245-248.



79. Wang T, Liang L, Xue Y, Jia PF, Chen W, Zhang MX, Wang YC, Li HJ, Yang WC: **A receptor heteromer mediates the male perception of female attractants in plants.** *Nature* 2016, **531**(7593):241-244.
80. Chen W: **Expression profile matrix of Arabidopsis transcription factor genes suggests their putative functions in response to environmental stresses.** *Plant Cell* 2002, **14**(3):559-574.
81. Nuruzzaman M, Sharoni AM, Kikuchi S: **Roles of NAC transcription factors in the regulation of biotic and abiotic stress responses in plants.** *Front Microbiol* 2013, **4**:248.
82. Cui Y, Ling Y, Zhou J, Li X: **Interference of the histone deacetylase inhibits pollen germination and pollen tube growth in *Picea wilsonii* Mast.** *PloS one* 2015, **10**(12):e0145661.
83. Cheng H, Qin L, Lee S, Fu X, Richards DE, Cao D, Luo D, Harberd NP, Peng J: **Gibberellin regulates Arabidopsis floral development via suppression of DELLA protein function.** *Development* 2004, **131**(5):1055-1064.
84. Mittler R, Vanderauwera S, Suzuki N, Miller G, Tognetti VB, Vandepoele K, Gollery M, Shulaev V, Van Breusegem F: **ROS signaling: the new wave?** *Trends Plant Sci* 2011, **16**(6):300-309.
85. Demidchik V: **Mechanisms of oxidative stress in plants: From classical chemistry to cell biology.** *Environ Exp Bot* 2015, **109**:212-228.
86. Lassig R, Gutermuth T, Bey TD, Konrad KR, Romeis T: **Pollen tube NAD(P)H oxidases act as a speed control to dampen growth rate oscillations during polarized cell growth.** *Plant J* 2014, **78**(1):94-106.
87. Wilkins KA, Bancroft J, Bosch M, Ings J, Smirnov N, Franklin-Tong VE: **Reactive oxygen species and nitric oxide mediate actin reorganization and programmed cell death in the self-incompatibility response of papaver.** *Plant Physiol* 2011, **156**(1):404-416.
88. Serrano I, Romero-Puertas MC, Sandalio LM, Olmedilla A: **The role of reactive oxygen species and nitric oxide in programmed cell death associated with self-incompatibility.** *J Exp Bot* 2015, **66**:2869-2867.
89. Jiang X, Gao Y, Zhou H, Chen J, Wu J, Zhang S: **Apoplasmic calmodulin promotes self-incompatible pollen tube growth by enhancing calcium influx and reactive oxygen species concentration in *Pyrus pyrifolia*.** *Plant Cell Reports* 2014, **33**:255-263.
90. Carraro L, Gerola PD, Lombardo G, Gerola FM: **Peroxidase Activity and Gametophytic Incompatibility: Bud-Pollination in *Petunia hybrida*.** *Caryologia* 1989, **42**(3-4):225-234.
91. Zhu J, Wu X, Yuan S, Qian D, Nan Q, An L, Xiang Y: **Annexin5 plays a vital role in Arabidopsis pollen development via Ca<sup>2+</sup>-dependent membrane trafficking.** *PloS One* 2014, **9**(7):e102407.
92. Swarbreck SM, Colaco R, Davies JM: **Plant calcium-permeable channels.** *Plant Physiol* 2013, **163**(2):514-522.
93. Wong HL, Pinontoan R, Hayashi K, Tabata R, Yaeno T, Hasegawa K, Kojima C, Yoshioka H, Iba K, Kawasaki T *et al*: **Regulation of rice NADPH Oxidase by binding of Rac GTPase to its N-terminal extension.** *Plant Cell* 2007, **19**(12):4022-4034.
94. Szumlanski AL, Nielsen E: **The Rab GTPase RabA4d regulates pollen tube tip growth in Arabidopsis thaliana.** *Plant Cell* 2009, **21**(2):526-544.

95. Karkonen A, Kuchitsu K: **Reactive oxygen species in cell wall metabolism and development in plants.** *Phytochemistry* 2015, **112**:22-32.
96. Anderson CT: **We be jammin': an update on pectin biosynthesis, trafficking and dynamics.** *J Exp Bot* 2016, **67**(2):495-502.
97. Chebli Y, Kaneda M, Zerzour R, Geitmann A: **The cell wall of the Arabidopsis pollen tube--spatial distribution, recycling, and network formation of polysaccharides.** *Plant Physiol* 2012, **160**(4):1940-1955.
98. Mollet J, Leroux C, Dardelle F, Lehner A: **Cell Wall Composition, Biosynthesis and Remodeling during Pollen Tube Growth.** *Planta* 2013, **2**(1):107-147.
99. De Nettancourt D, Devreux M, Laneri U: **Genetical and ultrastructural aspects of self and cross incompatibility in interspecific hybrids between self-compatible *Lycopersicon esulentum* and self-incompatible *L. peruvianum*.** *Theor App Genet* 1974, **44**:278-288.
100. de Abreu-Neto JB, Turchetto-Zolet AC, de Oliveira LFV, Zanettini MHB, Margis-Pinheiro M: **Heavy metal-associated isoprenylated plant protein (HIPP): characterization of a family of proteins exclusive to plants.** *The FEBS Journal* 2013, **280**:1604-1616.
101. Showalter AM, Keppler B, Lichtenberg J, Gu D, Welch L: **A bioinformatics approach to the identification, classification, and analysis of hydroxyproline-rich glycoproteins.** *Plant Physiol* 2010, **153**:485-513.
102. Jauh GY, Lord EM: **Localization of pectins and arabinogalactan-proteins in lily (*Lilium longiflorum* L.) pollen tube and style, and their possible roles in pollination.** *Planta* 1995, **199**:251-261.
103. **C. M. Rick Tomato Genetics Resource Center.** 2016. [<http://tgrc.ucdavis.edu/>], accessed 2016 Aug 16.
104. Rasband, W.S., 1997-2016. **ImageJ, U. S. National Institutes of Health, Bethesda, Maryland, USA** [<http://imagej.nih.gov/ij/>]
105. Buffalo, V. **Scythe, a bayesian adapter trimmer.** 2011-2014 [<https://github.com/vsbuffalo/scythe>], accessed 2016.
106. Dobin A, Davis CA, Schlesinger F, Drenkow J, Zaleski C, Jha S, Batut P, Chaisson M, Gingeras TR: **STAR: ultrafast universal RNA-seq aligner.** *Bioinformatics* 2013, **29**(1):15-21.
107. Fernandez-Pozo N, Menda N, Edwards JD, Saha S, Teclé IY, Strickler SR, Bombarely A, Fisher-York T, Pujar A, Forester H *et al*: **The Sol Genomics Network (SGN)—from genotype to phenotype to breeding.** *Nucleic Acids Research* 2015, **43**:D1036-D1041.
108. Liao Y, Smyth GK, Shi W: **Feature counts: an efficient general purpose program for assigning sequence reads to genomic features.** *Bioinformatics* 2014, **30**(7):923-930.
109. **Basic Local Alignment Search Tool.** 2016. [<https://blast.ncbi.nlm.nih.gov/Blast.cgi>], accessed 2016 Oct 10.
110. Law CW, Chen Y, Shi W, Smyth GK: **Voom: precision weights unlock linear model analysis tools for RNA-seq read counts.** *Genome biology* 2014, **15**(2):R29.
111. Smyth GK: **limma: linear models for microarray data.** In: *Bioinformatics and computational biology solutions using R and Bioconductor*. Springer; 2005: 397-420.
112. Robinson MD, McCarthy DJ, Smyth GK: **edgeR: a Bioconductor package for differential expression analysis of digital gene expression data.** *Bioinformatics* 2010, **26**(1):139-140.

113. R Core Team: **A language and environment for statistical computing**. In. Vienna, Austria: R Foundation for Statistical Computing; 2015.

597

**Table 1.** Top-25 upregulated genes in styles of LA1777 vs. LA0407.

| Gene             | p value | Mean expression | Fold change | Annotation                                                                     |
|------------------|---------|-----------------|-------------|--------------------------------------------------------------------------------|
| Sopen12g017530.1 | 1.9E-20 | 3.8             | 1451.4      | [HP] Hypothetical protein; Contains DUF pfam0403, heavy metal-associated       |
| Sopen02g037430.1 | 4.1E-17 | 4.2             | 163.8       | Cytochrome P450; family 81, subfamily D                                        |
| Sopen05g032070.1 | 3.8E-14 | 9.2             | 154.9       | Chalcone Synthase 2; flavonoid biosynthesis                                    |
| Sopen06g021780.1 | 5.1E-13 | 3.9             | 116.2       | Cytochrome P450; family 71, subfamily B                                        |
| Sopen01g011020.1 | 4.0E-21 | 75.9            | 108.4       | Hypothetical protein                                                           |
| Sopen12g006330.1 | 8.4E-15 | 22.2            | 58.6        | 2-Alkenal Reductase; involved in response to oxidative stress                  |
| Sopen08g021280.1 | 3.4E-11 | 8.4             | 51.8        | Chlorophyll a-b Binding Protein 3C                                             |
| Sopen12g026980.1 | 5.7E-14 | 4.0             | 36.6        | Glutathione S-Transferase; involved in stress response                         |
| Sopen05g003640.1 | 2.8E-19 | 4.3             | 35.6        | NAD(P)H Dehydrogenase Subunit; in chloroplast, PsbQ-like 2                     |
| Sopen09g003470.1 | 6.1E-06 | 10.3            | 32.1        | Threonine Dehydratase; isoleucine biosynthesis, plastid                        |
| Sopen04g002110.1 | 4.9E-12 | 5.2             | 29.6        | Programmed Cell Death 6-Interacting Protein; endosomal                         |
| Sopen05g001950.1 | 2.6E-17 | 4.3             | 28.7        | Major facilitator superfamily; oligopeptide transport protein                  |
| Sopen07g028940.1 | 4.8E-11 | 4.5             | 26.7        | Cytochrome P450; family 72, subfamily A                                        |
| Sopen02g033850.1 | 1.7E-10 | 10.6            | 22.0        | [HP] Hypothetical protein; 80% identity to <i>Solanum chacoense</i> RALF-like5 |
| Sopen02g027710.1 | 6.0E-09 | 182.2           | 20.2        | Acidic Endochitinase; involved in defense response                             |
| Sopen02g022730.1 | 2.5E-11 | 5.4             | 19.6        | Dormancy-Associated Auxin-Repressed small protein                              |
| Sopen02g021850.1 | 2.2E-11 | 3.4             | 18.9        | Transcription factor; bHLH30-like DNA binding superfamily                      |
| Sopen12g021490.1 | 7.0E-18 | 10.2            | 17.4        | NAD(P)-linked Oxidoreductase superfamily protein; involved in stress response  |
| Sopen10g025030.1 | 3.1E-09 | 4.9             | 14.9        | Dirigent-Protein Like 22; involved in defense response                         |
| Sopen11g004500.1 | 2.8E-08 | 3.8             | 14.4        | Beta Glucosidase 42 (BGLU42)                                                   |
| Sopen12g006340.1 | 6.6E-11 | 5.2             | 14.4        | Transferase, HXXXD-type acyl-transferase family protein                        |
| Sopen01g047950.1 | 1.6E-04 | 17.7            | 14.0        | ABC Transporter G family member 11-like; cutin or wax export, stress response  |
| Sopen10g001450.1 | 8.8E-18 | 3.2             | 13.4        | Hypothetical protein, chloroplast                                              |
| Sopen03g029620.1 | 1.0E-04 | 6.8             | 12.8        | Kunitz family trypsin and protease inhibitor (similar to Miraculin)            |
| Sopen05g030780.1 | 3.7E-12 | 18.8            | 12.8        | Chalcone-Flavanone Isomerase family protein                                    |

Gene annotation from Spenn\_v2.0 was enhanced, when possible, for genes noted as hypothetical proteins (marked as [HP]).

**Table 2.** Top-25 upregulated genes in pollen of LA1777 vs. LA0407.

| Gene             | p value | Mean expression | Fold change | Annotation                                                                                 |
|------------------|---------|-----------------|-------------|--------------------------------------------------------------------------------------------|
| Sopen12g014190.1 | 9.3E-05 | 26.2            | 2922.0      | [HP] Putative GPI-anchored AGP                                                             |
| Sopen01g010170.1 | 4.1E-04 | 3.7             | 1138.1      | Hypothetical protein                                                                       |
| Sopen12g018710.1 | 1.1E-05 | 2.7             | 598.0       | KH Domain RNA-Binding Protein                                                              |
| Sopen06g022970.1 | 7.5E-05 | 2.7             | 591.3       | Isoflavone-7-O-Methyltransferase 9; flavonol biosynthesis                                  |
| Sopen05g003280.1 | 3.0E-04 | 5.2             | 397.0       | F-box Protein CPR1/30; negative regulator of defense response                              |
| Sopen09g012310.1 | 7.7E-04 | 1.9             | 318.1       | Ribonuclease H-like superfamily protein; possible non-LTR retrotransposon family (LINE)    |
| Sopen10g022570.1 | 2.7E-05 | 1.9             | 287.3       | Hypothetical protein                                                                       |
| Sopen08g010210.1 | 7.1E-04 | 1.8             | 277.0       | [HP] Possible retroelement                                                                 |
| Sopen01g033860.1 | 2.2E-04 | 1.5             | 198.4       | RabA4 subfamily of Rab GTPases; promotes tip growth of pollen tubes                        |
| Sopen01g032940.1 | 3.6E-04 | 1.5             | 189.8       | Aspartyl Protease family protein, CDR1-like                                                |
| Sopen12g018720.1 | 2.0E-04 | 1.4             | 168.0       | Hypothetical protein                                                                       |
| Sopen12g022970.1 | 6.9E-04 | 1.3             | 154.6       | F-box/RNI superfamily; plant-specific FBD domain                                           |
| Sopen08g010180.1 | 6.2E-04 | 1.2             | 130.0       | Hypothetical protein                                                                       |
| Sopen03g005740.1 | 1.5E-04 | 1.1             | 105.8       | Acyl Activating Enzyme, Benzoate-CoA Ligase                                                |
| Sopen03g020850.1 | 5.5E-04 | 1.1             | 98.6        | Possible transcription factor; VND-interacting 1, NAC domain                               |
| Sopen12g027860.1 | 5.6E-04 | 1.0             | 86.2        | [HP] possible non-coding RNA                                                               |
| Sopen05g018880.1 | 1.6E-04 | 1.5             | 84.7        | Hypothetical protein                                                                       |
| Sopen10g022630.1 | 7.8E-04 | 0.9             | 74.6        | [HP] Non-coding RNA                                                                        |
| Sopen10g023190.1 | 2.1E-04 | 0.9             | 71.5        | [HP] Possible LTR retrotransposon                                                          |
| Sopen06g021510.1 | 5.4E-05 | 0.9             | 71.4        | Zeatin O-Glucosyltransferase-Like                                                          |
| Sopen12g006170.1 | 4.6E-06 | 9.5             | 70.0        | Basic Leucine Zipper 34-Like, transcription factor                                         |
| Sopen03g007850.1 | 1.7E-04 | 0.8             | 57.8        | Tetratricopeptide Repeat (TPR)-Like superfamily protein; pre-mRNA splicing factor SYF1     |
| Sopen10g028190.1 | 3.2E-04 | 1.1             | 52.6        | Wall-Associated Receptor Kinase (WAK2-like), Ca <sup>2+</sup> binding, cell wall expansion |
| Sopen02g013470.1 | 6.6E-04 | 1.1             | 50.4        | Cysteine-Rich RLK                                                                          |
| Sopen10g022640.1 | 5.4E-04 | 0.8             | 48.8        | [HP] Non-LTR retrotransposon family (LINE)                                                 |

Gene annotation from Spenn\_v2.0 was enhanced, when possible, for genes noted as hypothetical proteins (marked as [HP]).

**Table 3.** *Solanum habrochaites* populations used in this study.

| Country | Province or Department | Population/ Accession <sup>a</sup> | Mating system <sup>b</sup> | Interpopulation UI <sup>c</sup> |                          | Interspecific UI <sup>c</sup>         |                                          |
|---------|------------------------|------------------------------------|----------------------------|---------------------------------|--------------------------|---------------------------------------|------------------------------------------|
|         |                        |                                    |                            | Pollen accepted by LA1777       | Accepts pollen of LA0407 | Accepts pollen of <i>S. neorickii</i> | Accepts pollen of <i>S. lycopersicum</i> |
| Ecuador | Guayas                 | <b>LA0407</b>                      | SC                         | I                               | SC                       | C                                     | I                                        |
| Ecuador | Chimborazo             | <b>LA1223</b>                      | SC                         | I*                              | C                        | C                                     | C                                        |
| Ecuador | Chimborazo             | <b>LA1264</b>                      | SC                         | C                               | C                        | I                                     | I                                        |
| Ecuador | Loja                   | <b>LA2119</b>                      | SC                         | C                               | C                        | I                                     | I                                        |
| Ecuador | Loja                   | <b>LA2098</b>                      | SI/SC                      | C                               | I                        | I                                     | I                                        |
| Peru    | Ancash                 | <b>LA1777</b>                      | SI                         | SI                              | I                        | I                                     | I                                        |

<sup>a</sup> all populations and passport information was acquired from the Tomato Genetics Resource Center (TGRC, [tgrc.ucdavis.edu](http://tgrc.ucdavis.edu), [103]) at the University of California, Davis.

<sup>b</sup> mating system was verified experimentally, and is consistent with data from the TGRC, Rick *et al.* 1979 and Broz *et al.* 2016 [6, 44].

<sup>c</sup> interpopulation and interspecific UI as reported in Broz *et al.*, 2016 [6].

\*pollen of the LA1223 individual used in this experiment was not accepted by LA1777, Broz *et al.*, 2016 [6] reports variation in individual LA1223 phenotypes for this cross  
 SC, self-compatible; SI, self-incompatible; C, compatible; I, incompatible

**Table 4.** Upregulated genes in styles of LA1777 vs. LA0407 that show concordant expression patterns.

| <b>Interspecific UI (upregulated in LA2119)</b>     |                |                        |                    |                                                                     |
|-----------------------------------------------------|----------------|------------------------|--------------------|---------------------------------------------------------------------|
| <b>Gene</b>                                         | <b>p value</b> | <b>Mean expression</b> | <b>Fold change</b> | <b>Annotation</b>                                                   |
| Sopen01g011020.1                                    | 4.0E-21        | 75.9                   | 108.4              | Hypothetical protein                                                |
| Sopen12g021490.1                                    | 7.0E-18        | 10.2                   | 17.4               | NAD(P)-linked Oxidoreductase                                        |
| Sopen07g030750.1                                    | 1.0E-13        | 4.7                    | 6.1                | Cytochrome P450 (CYP72A15)                                          |
| Sopen06g026260.1                                    | 5.5E-17        | 39.4                   | 4.7                | Oxidoreductase, involved in lipid metabolic process                 |
| Sopen05g028380.1                                    | 2.0E-08        | 7.9                    | 3.6                | Heavy metal transport/detoxification superfamily protein            |
| Sopen10g033870.1                                    | 1.4E-10        | 12.7                   | 3.3                | RING/U-box superfamily protein                                      |
| Sopen12g006800.1                                    | 3.2E-13        | 73.7                   | 3.1                | Photosystem II, Light-harvesting Chlorophyll B-binding protein      |
| Sopen06g019380.1                                    | 1.6E-14        | 108.4                  | 3.1                | Photosystem I Reaction Center Subunit II                            |
| Sopen03g005470.1                                    | 1.2E-13        | 6.9                    | 3.0                | Peroxisomal Membrane 22 kDa (Mpv17/PMP22) family protein            |
| <b>Interpopulation UI (downregulated in LA2119)</b> |                |                        |                    |                                                                     |
| <b>Gene</b>                                         | <b>p value</b> | <b>Mean expression</b> | <b>Fold change</b> | <b>Annotation</b>                                                   |
| Sopen10g001450.1                                    | 8.8E-18        | 3.2                    | 13.4               | Unknown chloroplast stroma protein                                  |
| Sopen01g031170.1                                    | 5.3E-06        | 9.9                    | 11.0               | Transcription factor GRAS, DELLA-like protein                       |
| Sopen05g006860.1                                    | 7.4E-14        | 74.6                   | 6.5                | Alpha-1,4-Glucan-Protein Synthase, involved in cell wall biogenesis |
| Sopen11g005210.1                                    | 6.8E-19        | 33.1                   | 5.3                | Alpha/beta-Hydrolases superfamily protein, Serine Hydrolase         |
| Sopen11g028080.1                                    | 7.3E-16        | 5.2                    | 4.2                | DHBP, RibB-like; 3,4-Dihydroxyl-2-Butanone 4-Phosphate Synthase     |
| Sopen08g025270.1                                    | 7.9E-12        | 54.7                   | 4.1                | ABC-transporter-like, P-Glycoprotein 2 (PGP2)                       |
| Sopen03g006340.1                                    | 5.2E-13        | 19.1                   | 3.6                | Unknown function (DUF827)                                           |
| Sopen07g027150.1                                    | 3.4E-10        | 131.8                  | 3.5                | Phosphoenolpyruvate Carboxylase (PEPC)                              |
| Sopen12g001030.1                                    | 1.1E-08        | 9.2                    | 3.4                | RING/U-box superfamily protein                                      |
| Sopen04g034310.1                                    | 1.4E-09        | 2.8                    | 3.4                | HXXXD-type Acyl-transferase family protein                          |
| Sopen11g001350.1                                    | 2.6E-11        | 11.0                   | 3.1                | Plastid-lipid Associated Protein PAP / fibrillin family protein     |
| Sopen08g021970.1                                    | 2.8E-13        | 17.8                   | 3.1                | Hemoglobin Protein 3 (GLB3)                                         |
| Sopen12g006260.1                                    | 5.1E-13        | 3.9                    | 3.1                | F-box/LRR Protein, MAX2                                             |

A linear discriminant function was trained on the expression values of LA1777 and LA0407, and then used to classify other accessions as UI or non-UI.

**Table 5.** Upregulated genes in pollen of LA1777 vs. LA0407 that show concordant expression patterns.

| <b>Gene</b>      | <b>p value</b> | <b>Mean expression</b> | <b>Fold change</b> | <b>Annotation</b>                                                                            |
|------------------|----------------|------------------------|--------------------|----------------------------------------------------------------------------------------------|
| Sopen05g018880.1 | 1.58E-04       | 1.5                    | 84.7               | Hypothetical protein                                                                         |
| Sopen03g040880.1 | 8.68E-06       | 0.7                    | 36.0               | RNI-like, F-box, ubiquitin-protein ligase activity                                           |
| Sopen01g027170.1 | 7.75E-05       | 0.6                    | 28.5               | RNI-like, F-box, Skp2-like                                                                   |
| Sopen02g038110.1 | 7.81E-06       | 0.6                    | 24.9               | Cytochrome P450 724B1                                                                        |
| Sopen02g036410.1 | 1.18E-05       | 64.8                   | 16.7               | Putative Hexokinase                                                                          |
| Sopen12g026740.1 | 3.26E-04       | 114.7                  | 11.9               | Hypothetical protein                                                                         |
| Sopen10g027930.1 | 4.98E-04       | 5.0                    | 11.9               | RAPTOR/KOG homolog located in CUL4 RING ubiquitin ligase complex                             |
| Sopen01g008220.1 | 1.05E-04       | 1.9                    | 9.3                | Hypothetical protein                                                                         |
| Sopen05g029540.1 | 2.80E-04       | 0.4                    | 8.8                | RNA-directed DNA polymerase                                                                  |
| Sopen01g028020.1 | 5.26E-05       | 3.4                    | 7.3                | Hypothetical protein                                                                         |
| Sopen12g027920.1 | 4.39E-05       | 0.3                    | 7.0                | Zinc Finger Transcription Factor SUF4, involved in histone methylation                       |
| Sopen12g004180.1 | 3.29E-04       | 112.9                  | 4.6                | Oligouridylate Binding Protein 1B                                                            |
| Sopen01g005900.1 | 1.36E-04       | 111.6                  | 4.5                | Hypothetical protein                                                                         |
| Sopen05g030530.1 | 3.09E-04       | 20.8                   | 4.5                | Annexin, Ca <sup>2+</sup> -binding protein                                                   |
| Sopen03g024730.1 | 4.76E-05       | 5.5                    | 3.9                | DNA Helicase                                                                                 |
| Sopen03g027800.1 | 2.34E-04       | 10.9                   | 3.8                | Exostosin                                                                                    |
| Sopen02g038520.1 | 6.46E-04       | 247.3                  | 3.7                | Lysine-Histidine Transporter (LHT1)                                                          |
| Sopen11g020250.1 | 4.01E-04       | 5397.5                 | 3.7                | GATA Type Zinc Finger Transcription Factor                                                   |
| Sopen06g022340.1 | 4.85E-04       | 6.5                    | 3.5                | Disease resistance/zinc finger/chromosome condensation-like region domain containing protein |
| Sopen07g015260.1 | 3.61E-04       | 108.5                  | 3.2                | Vacuolar Proton ATPase Subunit VHA-a isoform 2                                               |
| Sopen11g021110.1 | 1.90E-04       | 129.8                  | 3.1                | Protein of unknown function, DUF593                                                          |
| Sopen06g009470.1 | 2.13E-04       | 0.8                    | 3.1                | Hypothetical protein                                                                         |

A linear discriminant function was trained on the expression values of LA1777 and LA0407, and then used to classify other accessions as UI or non-UI.



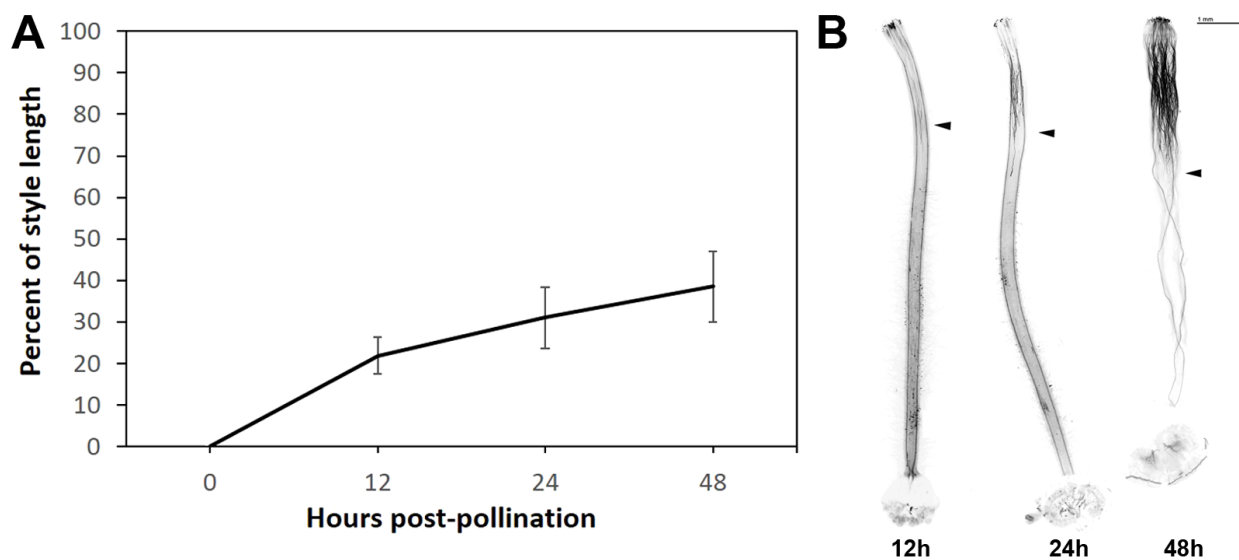

602 **Figure 1.** Interspecific pollen tube growth over time. Pistils of *Solanum habrochaites* LA1777  
603 were pollinated with LA0407 pollen and harvested at 12, 24 and 48 h after pollination. **A**, Time  
604 course of LA0407 pollen tube growth in styles of LA1777 with standard deviation for each time  
605 point. **B**, Representative image of LA0407 pollen tube growth in LA1777 pistils at each time  
606 point; arrowhead points to the location where the majority of pollen tubes are rejected.

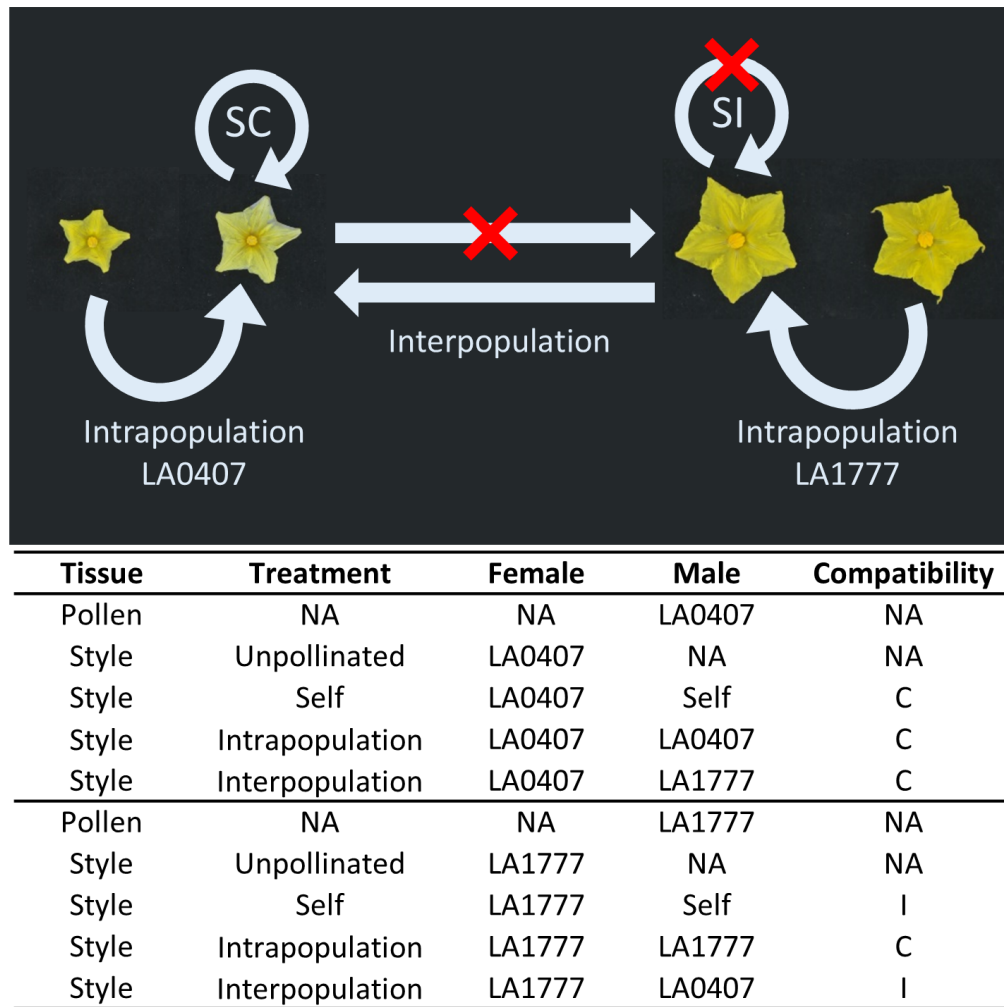

607 **Figure 2.** Experimental design for *Solanum habrochaites* RNA-seq experiment. Top panel:  
 608 compatibilities within and between *S. habrochaites* populations LA0407 and LA1777. SC, self-  
 609 compatible; SI self-incompatible. Bottom panel: Tissues (pollen, style) and stylar treatment  
 610 types (intrapopulation, interpopulation, self-pollinations and unpollinated) were collected for  
 611 three biological replicates of LA0407 and LA1777. C, compatible pollination; I, incompatible  
 612 pollination; NA, not applicable.

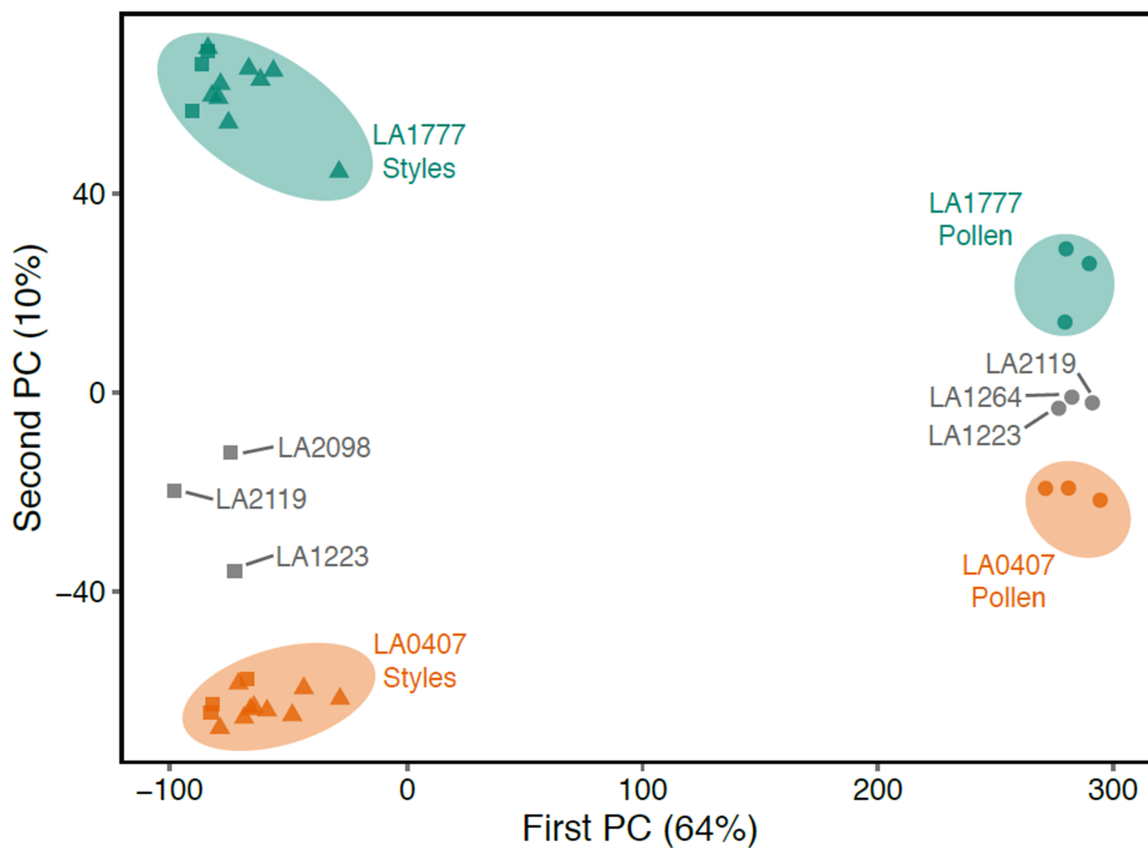

613 **Figure 3.** Genome-wide variation in gene expression across five populations of *Solanum*  
614 *habrochaites*, summarized by their first two principal components. The largest source of  
615 variation results from differences in expression between pollen (circles) and styles (unpollinated,  
616 squares; pollinated, triangles), on the first PC (horizontal axis). Variation across populations, on  
617 the other hand, accumulates on the second PC (vertical axis).

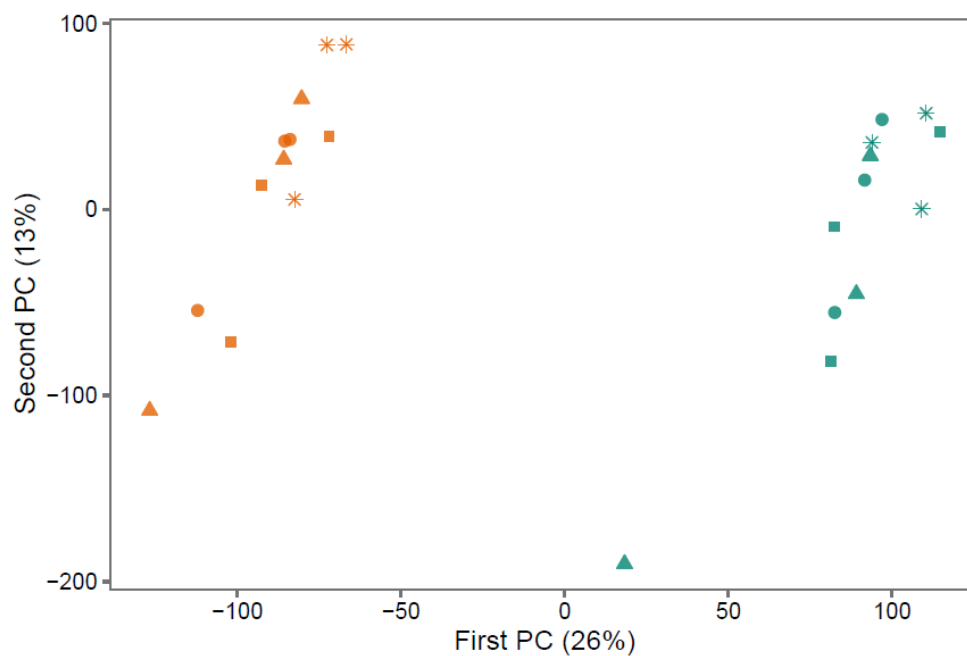

**Figure S1.** The genome-wide patterns of expression in styles from two populations of *Solanum habrochaites* (LA1777 in orange and LA0407 in green), summarized by a principal components analysis. Most variance among samples is due to differences between populations (horizontal axis), and we found no large differences among experimental treatments at this scale (unpollinated styles, stars; self-pollinated, circles; intrapopulation-pollinated, triangles; interpopulation-pollinated, squares).

**A**

```

Penn      MALVSWAKKELSKLKLQNKPKRLTLPQTSTKCLALPLIQEVILDADLRCTHCQNRVSSVI
Lyco      ---VSWAKKELSKLKLQNKPKRLTLPQTSTKCLALPLIQEVILDADLRCTHCQNRVSSVI
          *****

Penn      SNVEDVESIVVHVLEKKVTLIRKSTSK
Lyco      SNIEDVESIVVHVLEKKVTLIRKSTSK
          **:*****
  
```

**B**

```

Penn      MAGRVMLGVCVIFVVASVASITPAPSPNVAESPVDNNVIGTLDGGVGGAAPVGGPVPEG
Lyco      MAGHVMLGVCVIFVVASVASITPAPSPNVAESPVDNNVIGTLDGGVGGAAPVGGPVPEG
          *****

Penn      VFSNISPESESSAATINAHLSTIAIISSIVATSFLLS
Lyco      VFSNISPESQSSAATINAHLSTIAIISSIVATSFLLS
          *****:*****
  
```

**Figure S2.** Sequence alignments of hypothetical proteins showing the highest fold-change in UI-competent vs. UI-compromised tissues. **A**, The deduced amino acid sequence of *Solanum pennellii* Sopen12g017530 (Penn), the gene showing the highest fold change in UI-competent versus UI-compromised styles, is aligned to a *Solanum lycopersicum* (Lyco) EST (GenBank # AW092656.1) identified in an elicitor screen of tomato leaf. A BLAST search of *S. lycopersicum* gene models (SOLv2.4, solgenomics.net) did not return any results. Putative heavy metal binding domain (P-Fam 00403) is shown in blue; putative prenylation site (CaaX, where ‘a’ represents an aliphatic amino acid) is shown in bold “CLAL”. Cysteine residues involved in both domains are underlined. Stars represent residues conserved between both sequences. **B**, The deduced amino acid sequence of *Solanum pennellii* Sopen12g014190 (Penn), the gene showing the highest fold change in UI-competent versus UI-compromised pollen, is aligned with *Solanum lycopersicum* Solyc12g033100 (Lyco). Putative signal peptide is shown in bold; distinguishing dipeptide motifs of arabinogalactan proteins (AGPs) are underlined. Hydrophobic residues are highlighted in yellow. Stars represent residues conserved between both sequences.

## Method S1. Full command and parameters used for SHEAR in bioinformatics analysis of *S. habrochaites* transcriptomes.

---

```
#!/bin/bash

# These script snippets were used for the differential gene expression
analysis presented in
# Broz et al. "Transcriptomic characterization of a pollen-pistil unilateral
reproductive barrier"

# These will not run adequately without helper files (as indicated below)
# Software needed:
# scythe (github.com/vsbuffalo/scythe)
# shear (github.com/jbpease/shear)
# subread (subread.sourceforge.net/)
# STAR (github.com/alexdobin/STAR/)
# samtools (www.htslib.org/)

# Contact: Rafael F Guerrero, rafguerr@indiana.edu

# (1) Shear reads
#raw_R1_fullpaths.txt must contain all the names of the R1 fastq files to be
analyzed

while read line
do
a=${line:0:${#line}-9}

python shear.py \
--fq1 $a"_R1.fastq" \
--fq2 $a"_R2.fastq" \
--out1 $a"_sheared_R1.fastq" \
--out2 $a"_sheared_R2.fastq" \
--execscythe /N/soft/rhel6/scythe/0.992beta/scythe \
--tempdir $(pwd)/tempfiles_shear \
--trimfixed 0:0 --trimqual 20:20 --trimqualpad 0:0 --filterlength 50 --
trimpattern3 AGATC --trimpolyat 12 --trimambig --filterlowinfo 0.5 --
filterunpaired --filterqual 10 --filterambig 8

done < raw_R1_fullpaths.txt

# (2) STAR mapping
#shear_R1_fullpaths.txt must contain all the names of the R1 fastq files
preprocessed by shear
# The variable PATH_TO_GENOME must be set to the absolute path to the (STAR
indexed) reference genome

while read line
do
prefix=${line:0:${#line}-17}
```

```
dirname=${prefix}_penn
if [ ! -d "$dirname" ]; then
mkdir $dirname
cd $dirname
STAR \
--genomeDir $PATH_TO_GENOME \
--readFilesIn ${prefix}_sheared_R1.fastq /${prefix}_sheared_R2.fastq \
--runThreadN 8 \
--outReadsUnmapped Fastx \
--genomeLoad LoadAndKeep
fi
done < shear_R1_fullpaths.txt

# (3) Sorting, filtering and indexing alignment files
#dirnames.txt must have the absolute paths to the STAR output directories
(one per library)

while read line
do
cd $line
prefix="Aligned.out"
if [ ! -f "${prefix}".sorted.bam ]; then
samtools view -uS "${prefix}".sam > "${prefix}".bam
samtools sort $prefix.bam $prefix.sorted
samtools index $prefix.sorted.bam
rm $prefix.bam
fi
done < dirnames.txt

# (4) Counting reads in gene models with featureCounts from subread-1.4.6

featureCounts -T 15 -B -p -t exon -g Parent -a spenn_v2.0_exons.gff -o
all_counts_to_PENN.txt $(cat all_penn_bams.txt)
```
